# Supplementary material for: Landscape of Standing Variation for Tandem Duplications in Drosophila yakuba and Drosophila simulans
Source: PubMed Central journal article supplement — Mol Biol Evol. 2014 Apr 7;31(7):1750–66. doi: 10.1093/molbev/msu124 (PMC4069613; doi:10.1093/molbev/msu124), 2014-04-07
Supplement: supp_msu124_TextS1.pdf [file supp_msu124_TextS1.pdf]

# Supporting Information

## Illumina sequencing and mapping

The genomic DNA (gDNAs) used for the library preparations were extracted with the Genra Puregene Cell Kit including the RNase A Solution (Qiagen) or the reagents from the Puregene Accessories (Qiagen, as indicated below). The extraction and purification procedures were modified from the protocol for *D. melanogaster* (Qiagen Supplementary Protocol) and combined with column purification (Zymo) as described below, to give better and more constant yields with higher throughput.

About 15 frozen (-80°C) female flies of each fly line were homogenized into small pieces in cold 300 $\mu$ L Cell Lysis Solution (158906, Qiagen), and then incubated for 15min at room temperature. The RNAs were digested by 4.5ul RNase A Solution (158922, Qiagen) and incubated for 15min at 37°C. The contaminated proteins were precipitated by mixing with 100 $\mu$ L Protein Precipitation Solution (158910, Qiagen) and centrifuged 4min at 16,000g. The extracted gDNAs in the supernatant were column purified with the DNA Clean and Concentrator 25 Kit (D4013, Zymo) followed its protocol, using 5 volumes of Binding Buffer. The quality of these purified gDNAs were checked with 1% agarose gel, showed intact size of about 10 kb without degraded lower bands.

About 3 $\mu$ g purified gDNAs in 100 $\mu$ L EB (Elution Buffer, 10mM Tris, pH8.5, Invitrogen) were sheared with Covaris at 300 bp setting and purified with Purelink PCR Purification (HC) Kit (K3100-01, Invitrogen), followed their protocols respectively. The distributions of these fragments of about 300-1000 bp were confirmed with 2% agarose gel.

The purified fragments were end-repaired for 30min at 25°C with Quick Blunting Kit (E0542L, NEB), A-tailed for 30min at 37°C with Klenow Fragments (M02112L, NEB) and dATP (R0141, Fermentas), ligated to adaptors (see below) for 10min at 25°C with Quick Ligation Kit (E0542L, NEB), size selected between 350 bp to 450 bp on 2% agarose gel Seakem LE (5000, Lonza) and extracted with ZymoClean Gel DNA Recover Kit (D4001, Zymo), and PCR amplified 15 cycles by Phusion High-Fidelity DNA Polymerase (M0530S, NEB) with dNTP (N0447L, NEB) and Primers (see below), followed these reagents protocols respectively. The DNA Clean and Concentrator-5 Kits (D4013, Zymo) were used to purify the product after each reaction.

The libraries showed a band between 400 bp to 500 bp on 2% agarose gel. All concentrations through the preparation were measured with Qubit Fluorometer (Invitrogen). Final libraries were diluted to 10nM before sequencing, based on the reads from Qubit and the sizes from agarose gel.

Adapters and PCR Primers for Paired-End Library: All adapters and primers were HPLC purified and ordered from Integrated DNA Technologies (IDT):

PE-Ad1, 5'-/5Phos/GATCGGAAGAGCGGTTCAGCAGGAATGCCGAG

PE-Ad2, 5'-ACACTCTTTCCCTACACGACGCTCTTCCGATC\*T

PE-PCR, (1) 5'-AATGATACGGCGACCACCGAGATCTACACTCTTTCCCTACACGACGCTCTTCCGATC\*T

PE-PCR, (2) 5'-CAAGCAGAAGACGGCATACGAGATCGGTCTCGGCATTCTGCTGAACCGCTCTTCCGATC\*T

## HMM Parameters

Emission probabilities were defined using the probability density function of each respective normal distribution as below:

$$E_{deletion} = p(\text{SampleCoverage} - \text{ReferenceCoverage}) \sim N(-\mu_{Ref}, 2\sigma_{Ref}^2)$$

$$E_{singleton} = p(\text{SampleCoverage} - \text{ReferenceCoverage}) \sim N(0, 2\sigma_{Ref}^2)$$

$$E_{duplicate} = p(\text{SampleCoverage} - \text{ReferenceCoverage}) \sim N(\mu_{Ref}, 2\sigma_{Ref}^2)$$

$$E_{triplcate} = p(\text{SampleCoverage} - \text{ReferenceCoverage}) \sim N(2\mu_{Ref}, 2\sigma_{Ref}^2)$$

Where  $\mu_{Ref}$  and  $\sigma_{Ref}$  are the mean and standard deviation, respectively, for quantile normalized coverage in the reference strain for the window being evaluated. In each iteration, the most likely path was predicted using the Viterbi algorithm (Viterbi 1967), which identifies the most probable path for an HMM.

Initial state probabilities were set according to  $\pi_0$  and initial transition probabilities were set according to  $T_0$ , where row and column indices ranging from 0 to 3 are indicative of copy number. Initial probabilities are set such that the singleton state is initially most likely and states are initially most likely to remain constant during transitions.

$$\pi_0 = \begin{bmatrix} 0.07 & 0.79 & 0.07 & 0.07 \end{bmatrix}$$

$$T_0 = \begin{bmatrix} 0.79 & 0.07 & 0.07 & 0.07 \\ 0.07 & 0.79 & 0.07 & 0.07 \\ 0.07 & 0.07 & 0.79 & 0.07 \\ 0.07 & 0.07 & 0.07 & 0.79 \end{bmatrix}$$

HMM parameters of transition probabilities (T) and state likelihoods ( $\pi$ ) were optimized using Expectation Maximization based on the Viterbi predictions for each individual window until a steady state was reached. Emission probability distributions were not updated as data in a given window will often be insufficient for one or more underlying states. Coverage can change substantially from one region of the genome to another, and so state calls were estimated for 4 kb windows. For larger windows, the variance in reference coverage across the window can render the emission probabilities less sensitive, and smaller windows can result in insufficient data to obtain adequate likelihoods.

Transition probabilities serve to ground HMM output such that low transition probabilities lower the likelihood of state changes, resulting in smoother calls. However in extreme cases low estimated transition probabilities can have an extreme chilling effect such that they will overwhelm the emission probabilities. The minimum transition probability for any given state change was therefore set at  $p = 0.07$ . Minimum transition probabilities below a threshold of 0.05 can have a massive effect on the number of duplicated sites, but varying minimum transition probabilities between 0.05 and 0.15 have only a minor effect. Similarly the minimum state probability was set to 0.00025 for all states and minimum emission probability was set to  $10^{-10}$  to avoid zero probabilities.

Coverage can be highly stochastic and will depend on the amount of divergence between sample and reference, GC content, sequence complexity, and uniformity of error rates across sites. Requiring a more stringent mapping quality results in substantial coverage changes for many sites (Table S4). For even moderately divergent paralogs, higher mapping quality thresholds can greatly diminish our ability to observe two-fold increases in coverage.

In some cases, highly divergent paralogs may not display increases in coverage at all, and in other cases high variance in reference strain coverage may make automated detection of elevated coverage in samples extremely difficult. Many duplicated variants also show clear elevated coverage for a large portion of the region spanned by divergently-oriented reads, with drops in other regions. Whether these represent cases where reads fail to map due to divergence or whether they are subsequent deletion at duplicated sites through replication slippage or through the large-loop mismatch repair system remains ambiguous. Examples of these problematic regions are included in Figure S4. Additionally, duplicated regions that are substantially smaller than the 325 bp Illumina library insert size may not be identified easily using divergent read calls, but should be readily apparent in coverage changes. Hence, there may be some disparity between the HMM output and divergent read calls, especially for very small or highly divergent duplications.

Some previous CNV calling schemes have not taken advantage of HMM models, but rather have simply relied on regions of high coverage relative to the genome average (Alkan et al. 2009). These schemes cannot correct for local variation in coverage due to base composition or potential for mismapping, nor do they correct for natural variation in coverage

across genomic regions. Moreover, such models risk a high false positive rate among genomes with low levels of genomic duplication and high false negative rates for genomes that display rampant duplication. We observe substantial variation in coverage across sites within the reference, which is naturally accounted for in the HMM emission probabilities without the need for additional models or coverage corrections.

Previous work, especially analysis of microarrays, has clustered probes with two-fold coverage increases as indicative of a single duplication provided that they fell within a specific threshold distance (Emerson et al. 2008, Dopman and Hartl 2007, Conrad et al. 2010). Given the sparseness of microarray probes, such methods are prone to misidentify multiple duplications in a larger window as single duplications that span large sections of the genome. However, given the precision provided by Illumina resequencing, we are able to identify increased coverage at individual sites, which in combination with divergently-oriented reads should allow us to identify duplications with greater precision and increased ability to identify multiple small duplications that lie adjacent to one another.

## **Sample coverage**

Illumina reads from the *D. simulans* reference stock consist of a single lane of paired-end data with a 104 bp read length, resulting in a median coverage of 55X (considering only the major chromosome arms X, 2L, 2R, 3L, 3R, and 4) when aligned to the assembly described in (Hu et al. 2012). The remaining 41 samples were sequenced with two to three lanes of paired-end sequencing, with read lengths being a mix of primarily 54 bp and 76 bp (Tables

S2 and S1). Illumina reads cover 116 Mbp of the *D. simulans* reference and 99 Mbp of the *D. yakuba* reference (Table S3) The total sequencing thus consists of 123 lanes of Illumina data. Table S4 shows summary statistics of the sequencing at various mapping quality (Li and Durbin 2009) cutoffs. With no quality filters, median coverage of the major arms ranges from 55x to 151x, covering  $> 98\%$  of the genome with 95% of sites with non-zero coverage having a coverage  $\geq 7$  (Table S4). The variation in coverage from sample to sample, and the overall higher coverage in *D. simulans* compared to *D. yakuba* reflects the order in which the samples were sequenced. As the sequencing effort progressed, the throughput for Illumina runs increased, while the number of lanes and read length per lane were held constant, resulting in higher coverage.

Median raw coverage for the *D. yakuba* reference genome was 115X with a standard deviation of 404.25 and a range from 0 to 281347, whereas median raw coverage in the *D. simulans* reference was 55x with a standard deviation of 109.44 and a range from 0 to 8073 (Figure S6). While some regions have abnormally high coverage that inflates the standard deviation, the majority of the genome is sequenced to between 0 and 400X in both species (Figure S6). Excluding sites with raw coverage greater than 400X yields a median of 114X and a standard deviation of 54.99 in the *D. yakuba* references and a median of 55 and a standard deviation of 28.80 in the *D. simulans* reference. Distributions of raw coverage were highly similar for all strains (Figure S2, S3).

Increasing quality filters results in modest changes in median coverage, but has a noticeable effect on the number of sites with a coverage of zero ( $f_{0,X}$ ) and on the first

quantile of coverage for sites with coverage greater than zero ( $Q_{1,X}$ , Table S4). These data would suggest that a large number of sites with single digit raw coverage in the reference may be the product of sequencing errors and mismapping. The affect of imposing additional map quality filters is stronger in sample strains than in the reference (Table S4) and can impede mappings in the face of even a small number of mismatches. Hence, for all analyses of coverage changes in sample strains relative to reference, we used coverage with no additional quality filters, a factor that is essential in detecting increased coverage for even modestly diverged regions. Targeted insert size for Illumina libraries was 325 bp, median fragment size by line ranges from 270 bp-532 bp (Table S5).

## ***In silico* confirmation of rearrangements**

### ***De novo* assembly of breakpoints**

A putative tandem duplication results in the formation of a single novel sequence junction (Cridland and Thornton 2010; Figure S7). Reads mapping to this novel junction will fail to map to an existing reference genome Mackay et al. (2012). We mined the both the divergently-oriented reads and mapped/unmapped read pairs from the putative breakpoint region (Figure S8A) using `samtools` version 0.1.18 Li et al. (2009) and fed them into `phrap` version 1.090518 (<http://www.phrap.org>) for assembly. We used the following parameters for `phrap`: `-vector_bound 0 -forcelevel 10 -minscore 10 -minmatch 10 -new_ace -bypasslevel 1 -maxgap 45 -revise_greedy -force_high`.



## Homology searches using `lastz`

The contigs obtained from `phrap` were then subjected to a homology search against the reference genome using `lastz` version 1.02.00 (<http://www.bx.psu.edu/~rsharris/lastz/>) Harris (2007), and the resulting alignments chained together using `axtChain` and parsed with `chainNet` Kent et al. (2003). These latter two tools combine the alignments from `lastz` to find the highest-scoring colinear alignment of a query to a target, and then separate alignments into separate files by target, respectively. A single contig chaining within  $X$ bp of the regions identified by divergently-oriented reads as flanking the breakpoints was considered to have confirmed the existence of the event. In practice, we let  $X$  equal 0, 50, or 100 base pairs.

## CNV calling

We identify 38 divergent read calls consistent with tandem duplications in the *D. yakuba* reference strain, 20 of which are specific to the reference strain. Meanwhile the *D. simulans* reference strain has 92 divergent calls in the reference strain, 29 of which are specific to the reference. These unannotated duplicates in the reference sequence were excluded from downstream analyses on the grounds that they are likely to be biased with respect to gene content, genomic location, base composition, and population frequency. Excluding unannotated duplicates in the reference and putative ancestral duplications, *D. yakuba* has an average of 148.6 duplications per strain with a standard deviation of 41.7, while in *D. simulans* we find 113 duplications per strain with a standard deviation of only 15.6 (Table S6) and a weak correlation between coverage and number of variants per strain (Figure 4). Hence the variance in number of duplications per strain is 7.5x greater in *D. yakuba*, in addition to strains harboring on average greater numbers of tandem duplications. Corresponding numbers with reference duplicates and ancestral duplications included are found in Table S7. The distribution of read pair depth indicating events for a representative sample strain, CY20A, is in Figure S1.

We used a Hidden Markov Model that compares coverage in genomic resequencing of the reference to observed coverage in reference strains to identify regions with elevated coverage consistent with duplication of sequences spanned by divergently-oriented reads. Coverage was quantile normalized prior to analysis so that each strain displays equal mean and variance, rendering tests of differential coverage robust in the face of differing sequence

depth across samples or across sites (Bolstad et al. 2003).

In some cases, a duplication may in fact exist, but due to lower sequencing coverage in one strain, or due to stochastic effects of sampling, a duplication may not be identified via paired-end reads. Such false negatives may be more common for variants that are significantly smaller than the library insert size where the likelihood of finding divergently-oriented reads is far lower. To correct the frequency distribution for such false negatives, we used increased coverage to identify duplications in additional strains. For duplications defined using 3 or more pairs of divergently-oriented reads that also showed at least one divergently-oriented read pair as well as two-fold or greater coverage increases in additional strains, frequencies were corrected to include a duplication in that strain.

For *D. yakuba*, frequency correction based on increased coverage resulted in additional calls for 10 duplications across a total of 17 calls in individual strains for duplications larger than 325 bp, yielding a final total of 1033 duplications across 2323 calls in individual strains greater than the targeted library insert size. These estimates suggest that among duplications that can be identified using paired-end reads, the false negative rate is 0.732% ( $\frac{17}{2323}$ ) for duplications larger than the library insert size. For duplications smaller than the targeted library insert size we corrected the frequency estimates for 53 duplications resulting in a total of 91 duplication calls in additional strains. Compared to the total of 691 calls in individual strains across 382 duplications, the false negative rate for duplications smaller than the targeted library insert size is 13.2% ( $\frac{91}{691}$ ) for an overall false negative rate of 3.6% ( $\frac{108}{3014}$ ). In *D. simulans*, corrections result in 14 additional duplication calls across 11 duplicated sites for

duplicates smaller than 325 bp and 4 additional calls across 2 sites for duplicates larger than 325 bp. The resulting false negative rates are 4.3% ( $\frac{14}{329}$ ) for small duplications and 0.20% ( $\frac{4}{1964}$ ) for duplications larger than the library insert size for an overall false negative rate of 0.78% ( $\frac{18}{2293}$ ). Duplicate size and coverage with divergently-oriented reads are not correlated in individual samples ( $R = -0.048$ ,  $P = 0.55$ ) suggesting that methods are unbiased with respect to duplicate size.

We have excluded duplications larger than 25 kb as these are substantially less likely to display increased coverage across the span of divergently-oriented reads. While there may be some duplications larger than 25 kb, such divergently-oriented reads may be caused by within-chromosome translocations or TE movement as well as tandem duplications, and thus the genetic constructs which produce these abnormal mappings are uncertain. We, however, observe no duplications greater than 25 kb which have continuously elevated coverage across the span of divergently-oriented reads, consistent with size limits observed in previous surveys in *D. melanogaster* (Dopman and Hartl 2007).

## Confirmation with long sequencing reads

We generated PacBio genomic DNA libraries for four sample strains to roughly 8X coverage. A total of 10ug Qiagen column purified genomic DNA was sheared using a Covaris g-tube according to PacBio. Protocol low-input 10 kb preparation and sequencing (MagBead Station). The Covaris protocol for g-tube was followed (Beckman Allegra 25R centrifuge). AMPure magnetic beads were purchased directly from Beckman and manually washed

according to the protocol in Pacific Biosciences Template Preparation and Sequencing Guide. DNA template prep kit 2.0 (3 kb-10 kb) was used for library construction. After construction of the 10 kb SMRTbell template, the concentration was measured by Qubit and the library size analysis performed using an Agilent Bioanalyzer. The Pacific Biosciences calculator (version 1.3.3) determined the amount of sequencing primer to anneal and the amount of polymerase to bind (DNAPolymerase binding kit 2.0). The calculator also recommended sample concentrations for binding the polymerase loaded SMRTbell templates to MagBeads.

The PacBio RS remote version 1.3.3 set up the sequencing reaction by identifying sample wells, sequencing protocol, number of SMRT cells and length of movie. The sequencing protocol was MagBead standard seq v1. Reagents from DNA sequencing kit 2.0 were used for the sequencing protocol. 120 minute movies were taken for each SMRTcell. The SMRT cells were version 3. DNA control complex 2.0 (3 kb-10 kb) was the internal control. Five SMRT cells were analyzed for the 10 kb preparation of *D. yakuba* reference genome. The movie which records the light pulses during nucleotide incorporation is delivered in real time to the primary analysis pipeline which is housed completely in the Blade Center. Proprietary algorithms translate each pulse into bases with a set of quality metrics. The data is then available for secondary analysis. SMRT Portal version v1.4.0 build 118282 with RS\_only filter protocol generated the FASTQ files for the sequences and the circular consensus reads (CCS). The default filters were removal of reads <50 bases and less than 0.75 accuracy.

The single-molecule sequencing resulted in an average genomic coverage of 8X for samples CY17C, CY21B3 and NY66, NY73. The entire genome is spanned by only on the order

of  $10^7$  reads (Table S11), offering low clone-coverage and providing sparse opportunities for confirmation. The detailed results from long-read alignments are shown in Tables S8. The single unconfirmed event in line NY66 has nonzero coverage throughout the duplicated region, but coverage drops to zero immediately 3' of the 3' locus containing divergent short reads and there is evidence of large deletions with respect to the reference, but no single read suggesting a tandem duplication. Thus, only three events were not confirmed (one event per sample), suggesting that our protocol for identifying structural variants using short read data has a 96.1% confirmation rate, and a low false positive rate. For two of these unconfirmed rearrangements we do not have sufficient data to confirm or refute the existence of a rearrangement. Thus, the true false positive rate is likely to be less than the 3.9% implied by these numbers. Thus, single-molecule sequencing suggests that our protocol for detecting tandem duplications via short reads is highly accurate.

## Short split read mapping

For comparison of performance (see Results), we ran Pindel version 0.2.5a1 (Ye et al. 2009) with command line options

```
--max_range_index 4 --RP --report_inversions --report_duplications
--report_long_insertions --report_breakpoints --report_close_mapped_reads
--min_inversion_size 500 --min_num_matched_bases 20 --additional_mismatch 1
--min_perfect_match_around_BP 3 --sequencing_error_rate 0.05
--maximum_allowed_mismatch_rate 0.02 --anchor_quality 20
```

`--balance_cutoff 100 --window_size 0.01 --minimum_support_for_event 3`  
`--sensitivity 0.99` to identify duplications on each major chromosome arm independently. We required that duplication breakpoints be spanned by at least one read on each strand with a total coverage depth of at least three reads, keeping only calls which map to regions with coverage across all strains. These requirements are somewhat more lenient than the paired read mapping above in that they do not remove putative PCR duplicates, due to a smaller span in which split reads may reasonably be expected to map. Overlap between Pindel and paired-end reads is low, with 11.7% of duplicates (179 of 1415) in *D. yakuba*, as defined by paired-end reads matching duplicates whose breakpoints lie within 100 bp of breakpoints defined by split read mapping of Illumina sequence data (Table S29). These 179 variants capture 102 genes or gene fragments, including 21 whole or nearly whole duplicates ( $\leq 90\%$  of CDS span). Only 5 out of 179 (2.7%) are flanked by 30 bp or longer direct repeats in the reference, and none are flanked by 100 bp or longer direct repeats. The site frequency spectra for these confirmed duplicates is also significantly different from that of all duplicates defined by paired-end read mapping ( $W = 136270$ ,  $P = 0.0369$ ).

Yet, we observe a high confirmation rate for duplicates defined by paired-end read orientation, meaning that the false negative rate for Pindel is extremely high. Thus, it would seem that paired-end reads mapping grossly outperforms Pindel for duplications greater than 50 bp when coverage is high. After clustering across strains, requiring that breakpoints in different strains fall within 100 bp of one another, consistent with criteria used for paired-end read orientation, we find 1620 duplications that are not represented among paired-end reads

(Table S29), with an average length of 155 bp, in stark contrast to duplicates defined using paired-end reads, with a maximum span identified solely by Pindel of 5766 bp. Thus, Pindel is likely to outperform paired-end read mapping for extremely small duplications but will perform poorly for duplications larger than the library insert size.

Only 11.7% of duplicates identified with paired end reads are identified through split read mapping (Table S29) (Ye et al. 2009), which is expected with short Illumina reads (Table S1-S2), especially in cases where variants are flanked by repetitive sequence (Text S1). Yet, variants identified through paired end read mapping have a 96.1% confirmation rate with long molecule sequencing. Thus, split read mapping with short sequences has a high false negative rate, and was therefore not used for identification of tandem duplicates or following analyses. In a further attempt to establish precise breakpoints from Illumina sequencing data, we attempted to assemble and confirm *in silico* with short Illumina reads (Text S1, Figure S7-S8). We have reconstructed 49.9% of breakpoints in *D. yakuba* and 58.1% of breakpoints in *D. simulans* that are larger than the 325 bp targeted insert size. Assembly rates increase for larger duplications (Table S30) with 60.3% of breakpoints in *D. yakuba* and 71.5% of breakpoints in *D. simulans* over 1 kb that can be assembled. There are no apparent differences in breakpoint assembly between the X and the autosomes (Table S30) and no significant difference in the frequency spectrum of variants with assembled breakpoints (Figure S9-S10). However, requiring breakpoint reconstruction would eliminate a large amount of the observed variation and likely be biased against repetitive sequences as well as against small variants.



## Genome wide surveys

Some regions of the genome cannot be surveyed due to technical limitations. We are unable to identify duplicates flanked by repeats in the reference genome which have zero divergence and are beyond the size limits of our Illumina sequencing library insert size. We identify 121 direct repeats in the *D. yakuba* reference with 99.5% identity to one another which are 300 bp or larger and lie within 25 kb of one another, spanning a total of 678,707 bp (0.57%) of the *D. yakuba* reference (Table S12). In *D. simulans* we identify only 5 such direct repeats, covering 84,055 bp of sequence (0.09%) of the reference sequence (Table S12). In principle, such divergence levels amount to one divergent site per 200 bp, and therefore are expected to be captured with paired end read data. However, these criteria are extremely lenient and offer an upper bound of sequence where repeats might confound duplicate identification. Additionally, duplications whose breakpoints lie within the span of repeats could potentially still be identified, and therefore we did not apply any filters to exclude these regions. These estimates therefore represent an upper bound of sequence in the reference that cannot be readily surveyed. Assuming that the *D. yakuba* reference genome is representative of strains in the population, the number of variants that are unidentified due to repetitive content is likely to be very low.

The methods described here are similarly precluded from surveying sites which have zero coverage across strains and not associated with deletions but are simply a product of stochastic effects of library prep. This filter removes 0.9-1.6% of sequence per strain in *D. simulans* and 1.2-1.8% of sequence in *D. yakuba* and will therefore have limited effect.

We therefore suggest that the number of tandem duplicates identified via paired end read mapping in high coverage sequencing are therefore likely to be an accurate representation of genome wide variation in the population.

Table S1: Sequencing statistics for *Drosophila yakuba* libraries

| Species                  | Sample    | Read length | Number of read pairs |
|--------------------------|-----------|-------------|----------------------|
| <i>Drosophila yakuba</i> | reference | 54          | 27,771,582           |
|                          |           | 76          | 29,065,488           |
|                          |           | 105         | 68,660,482           |
|                          | CY20A     | 76          | 86,628,715           |
|                          |           | 76          | 35,886,204           |
|                          |           | 76          | 39,262,696           |
|                          | CY28      | 54          | 31,908,008           |
|                          |           | 76          | 40,631,850           |
|                          |           | 76          | 33,242,246           |
|                          | CY01A     | 48          | 25,239,444           |
|                          |           | 54          | 25,206,710           |
|                          |           | 76          | 25,393,295           |
|                          | CY02B5    | 76          | 111,535,323          |
|                          |           | 48          | 20,266,663           |
|                          |           | 54          | 23,669,407           |
|                          | CY04B     | 76          | 30,960,740           |
|                          |           | 48          | 20,525,873           |
|                          |           | 54          | 19,048,177           |
|                          | CY08A     | 76          | 29,088,850           |
|                          |           | 76          | 81,634,715           |
|                          |           | 48          | 22,518,030           |
|                          | CY13A     | 76          | 28,321,290           |
|                          |           | 54          | 31,630,793           |
|                          |           | 48          | 21,632,572           |
|                          | CY17C     | 76          | 26,933,913           |
|                          |           | 54          | 31,252,102           |
|                          |           | 48          | 25,560,116           |
|                          | CY21B3    | 76          | 30,498,100           |
|                          |           | 54          | 29,303,889           |
|                          |           | 76          | 116,502,064          |
|                          | CY22B     | 48          | 21,084,747           |
|                          |           | 76          | 28,094,292           |
|                          |           | 54          | 24,831,622           |
|                          | NY66-2    | 76          | 92,234,832           |
|                          |           | 54          | 21,924,434           |
|                          |           | 76          | 25,916,918           |
|                          | NY81      | 54          | 26,611,105           |
|                          |           | 54          | 24,894,912           |
|                          |           | 76          | 26,776,198           |
|                          | NY48      | 76          | 88,481,425           |
|                          |           | 54          | 25,534,953           |
|                          |           | 76          | 27,838,117           |
|                          | NY56      | 76          | 85,887,835           |
|                          |           | 54          | 23,129,714           |
|                          |           | 76          | 28,500,212           |
|                          | NY62      | 76          | 30,114,197           |
|                          |           | 54          | 26,486,845           |
|                          |           | 76          | 31,506,258           |
|                          | NY65      | 76          | 32,601,617           |
|                          |           | 54          | 29,743,963           |
|                          |           | 76          | 30,946,111           |
|                          | NY73      | 76          | 31,529,718           |
|                          |           | 54          | 27,490,843           |
|                          |           | 76          | 32,600,073           |
| NY42                     | 76        | 28,468,446  |                      |
|                          | 54        | 27,534,698  |                      |
|                          | 76        | 31,988,717  |                      |
| NY85                     | 76        | 29,556,013  |                      |
|                          | 54        | 33,715,271  |                      |
|                          | 76        | 42,770,174  |                      |
| NY141                    | 76        | 35,701,540  |                      |
|                          | 54        | 27,811,873  |                      |
|                          | 76        | 32,528,787  |                      |
| 19                       | 76        | 33,047,656  |                      |
|                          | 54        | 25,298,106  |                      |
|                          | 76        | 80,761,937  |                      |
|                          |           | 76          | 30,145,168           |

CY= Cameroon *D. yakuba*, NY = Nairobi *D. yakuba*

Table S2: Sequencing statistics for *D. simulans* libraries

| Species                    | Sample                    | Read length | Number of read pairs |
|----------------------------|---------------------------|-------------|----------------------|
| <i>Drosophila simulans</i> | reference ( <i>w501</i> ) | 104         | 46,855,159           |
|                            | MD221                     | 76          | 41,341,930           |
|                            |                           | 76          | 43,274,500           |
|                            |                           | 54          | 42,866,171           |
|                            | MD06                      | 54          | 40,300,257           |
|                            |                           | 76          | 36,879,386           |
|                            |                           | 76          | 44,594,779           |
|                            | MD63                      | 54          | 29,033,259           |
|                            |                           | 76          | 34,548,640           |
|                            |                           | 76          | 32,326,841           |
|                            | MD251                     | 76          | 42,795,040           |
|                            |                           | 54          | 42,248,728           |
|                            |                           | 76          | 43,250,191           |
|                            | MD105                     | 54          | 28,957,390           |
|                            |                           | 76          | 35,059,033           |
|                            |                           | 76          | 30,862,150           |
|                            | MD199                     | 54          | 39,280,145           |
|                            |                           | 76          | 41,798,120           |
|                            |                           | 76          | 42,708,601           |
|                            | MD106                     | 76          | 45,264,776           |
|                            |                           | 76          | 45,425,267           |
|                            |                           | 54          | 42,630,510           |
|                            | MD73                      | 76          | 43,929,651           |
|                            |                           | 76          | 44,473,268           |
|                            |                           | 76          | 24,882,026           |
|                            | MD15                      | 76          | 38,422,860           |
|                            |                           | 76          | 38,035,776           |
|                            |                           | 76          | 44,330,417           |
|                            | MD233                     | 76          | 38,302,627           |
|                            |                           | 76          | 38,525,975           |
|                            |                           | 54          | 41,655,021           |
|                            | NS40                      | 76          | 42,810,725           |
|                            |                           | 76          | 44,451,089           |
|                            |                           | 54          | 43,132,030           |
|                            | NS05                      | 76          | 42,000,020           |
|                            |                           | 76          | 43,987,326           |
|                            |                           | 54          | 31,917,670           |
|                            | NS137                     | 76          | 39,650,018           |
|                            |                           | 76          | 34,951,602           |
|                            |                           | 54          | 41,063,490           |
|                            | NS39                      | 76          | 42,341,695           |
|                            |                           | 76          | 45,140,717           |
|                            |                           | 76          | 42,962,176           |
|                            | NS67                      | 76          | 36,357,328           |
|                            |                           | 76          | 39,932,110           |
|                            |                           | 76          | 40,491,844           |
|                            | NS50                      | 76          | 32,795,824           |
|                            |                           | 76          | 37,809,667           |
|                            |                           | 76          | 37,031,543           |
|                            | NS113                     | 76          | 34,325,117           |
|                            |                           | 76          | 37,031,994           |
|                            |                           | 76          | 41,381,084           |
|                            | NS78                      | 76          | 36,771,570           |
| 76                         |                           | 38,763,692  |                      |
| 76                         |                           | 37,225,499  |                      |
| NS33                       | 76                        | 34,271,146  |                      |
|                            | 76                        | 36,656,786  |                      |
|                            | 76                        | 38,326,489  |                      |
| NS79                       | 76                        | 36,965,044  |                      |
|                            | 76                        | 40,146,925  |                      |

MD = Madagascar *D. simulans*, NS = Nairobi *D. simulans*.

Table S3: Bases with coverage in reference

| chrom | <i>D. simulans</i> | <i>D. yakuba</i> |
|-------|--------------------|------------------|
| 2L    | 23275275           | 28575774         |
| 2R    | 21329557           | 23894902         |
| 3L    | 23878518           | 21033386         |
| 3R    | 26966593           | 22193704         |
| 4     | 1007160            | 1342752          |
| X     | 20607623           | 21512027         |

Table S4: Summaries of raw sequence coverage for inbred lines at mapping quality thresholds

| Species                    | Sample    | $M_0^a$ | $f_{0,0}^b$ | $Q_{1,0}^c$ | $M_{20}^a$ | $f_{0,20}^b$ | $Q_{1,20}^c$ | $M_{30}^a$ | $f_{0,30}^b$ | $Q_{1,30}^c$ |
|----------------------------|-----------|---------|-------------|-------------|------------|--------------|--------------|------------|--------------|--------------|
| <i>Drosophila simulans</i> | reference | 55      | 0.012       | 8           | 55         | 0.046        | 15           | 49         | 0.047        | 10           |
|                            | MD221     | 118     | 0.017       | 19          | 116        | 0.051        | 25           | 90         | 0.071        | 5            |
|                            | MD06      | 115     | 0.017       | 17          | 113        | 0.051        | 24           | 85         | 0.071        | 4            |
|                            | MD63      | 90      | 0.017       | 15          | 89         | 0.051        | 22           | 70         | 0.071        | 3            |
|                            | NS40      | 121     | 0.017       | 22          | 119        | 0.051        | 32           | 95         | 0.070        | 5            |
|                            | MD251     | 118     | 0.017       | 19          | 116        | 0.051        | 26           | 90         | 0.071        | 5            |
|                            | MD105     | 92      | 0.016       | 14          | 90         | 0.051        | 22           | 71         | 0.070        | 3            |
|                            | MD199     | 114     | 0.017       | 19          | 112        | 0.051        | 27           | 90         | 0.069        | 5            |
|                            | NS05      | 119     | 0.017       | 20          | 118        | 0.051        | 27           | 92         | 0.069        | 5            |
|                            | NS137     | 98      | 0.017       | 17          | 96         | 0.051        | 26           | 76         | 0.071        | 4            |
|                            | NS39      | 121     | 0.016       | 20          | 119        | 0.051        | 30           | 94         | 0.069        | 5            |
|                            | MD73      | 120     | 0.016       | 20          | 118        | 0.051        | 29           | 93         | 0.069        | 5            |
|                            | MD106     | 87      | 0.018       | 14          | 86         | 0.052        | 18           | 64         | 0.078        | 4            |
|                            | NS67      | 124     | 0.018       | 21          | 122        | 0.051        | 34           | 97         | 0.075        | 6            |
|                            | NS50      | 117     | 0.017       | 19          | 116        | 0.052        | 29           | 91         | 0.076        | 6            |
|                            | NS113     | 111     | 0.017       | 18          | 109        | 0.051        | 27           | 85         | 0.074        | 5            |
|                            | NS78      | 122     | 0.018       | 19          | 120        | 0.051        | 25           | 94         | 0.075        | 6            |
|                            | MD15      | 97      | 0.018       | 16          | 95         | 0.052        | 21           | 71         | 0.078        | 4            |
|                            | NS33      | 111     | 0.017       | 18          | 109        | 0.051        | 26           | 86         | 0.074        | 5            |
|                            | NS79      | 120     | 0.018       | 21          | 118        | 0.051        | 29           | 93         | 0.075        | 6            |
| MD233                      | 121       | 0.017   | 21          | 119         | 0.051      | 30           | 90           | 0.076      | 5            |              |
| <i>Drosophila yakuba</i>   | reference | 124     | 0.009       | 36          | 122        | 0.015        | 11           | 111        | 0.023        | 4            |
|                            | CY20A     | 149     | 0.013       | 20          | 146        | 0.032        | 4            | 121        | 0.060        | 3            |
|                            | CY28      | 85      | 0.013       | 11          | 83         | 0.036        | 3            | 66         | 0.067        | 2            |
|                            | CY01A     | 151     | 0.012       | 21          | 148        | 0.032        | 4            | 123        | 0.056        | 2            |
|                            | CY02B5    | 55      | 0.013       | 8           | 54         | 0.039        | 2            | 44         | 0.067        | 2            |
|                            | CY04B     | 125     | 0.013       | 17          | 123        | 0.036        | 4            | 102        | 0.063        | 2            |
|                            | CY08A     | 57      | 0.013       | 9           | 55         | 0.036        | 2            | 45         | 0.066        | 1            |
|                            | CY13A     | 56      | 0.014       | 9           | 54         | 0.036        | 2            | 45         | 0.068        | 1            |
|                            | CY17C     | 151     | 0.012       | 21          | 148        | 0.031        | 4            | 118        | 0.058        | 2            |
|                            | CY21B3    | 139     | 0.012       | 21          | 137        | 0.029        | 3            | 113        | 0.053        | 2            |
|                            | CY22B     | 56      | 0.014       | 8           | 55         | 0.038        | 2            | 45         | 0.071        | 1            |
|                            | NY66-2    | 110     | 0.014       | 15          | 107        | 0.038        | 4            | 85         | 0.070        | 2            |
|                            | NY81      | 107     | 0.014       | 14          | 104        | 0.038        | 5            | 82         | 0.070        | 2            |
|                            | NY48      | 64      | 0.015       | 9           | 62         | 0.040        | 3            | 49         | 0.072        | 2            |
|                            | NY56      | 60      | 0.016       | 7           | 58         | 0.044        | 4            | 45         | 0.081        | 2            |
|                            | NY62      | 70      | 0.013       | 10          | 68         | 0.036        | 3            | 54         | 0.066        | 2            |
|                            | NY65      | 69      | 0.014       | 10          | 68         | 0.039        | 4            | 54         | 0.072        | 2            |
|                            | NY73      | 68      | 0.015       | 9           | 66         | 0.041        | 4            | 53         | 0.073        | 2            |
|                            | NY42      | 93      | 0.014       | 12          | 91         | 0.037        | 3            | 74         | 0.067        | 2            |
|                            | NY85      | 79      | 0.013       | 12          | 78         | 0.033        | 3            | 64         | 0.062        | 2            |
| NY141                      | 110       | 0.015   | 14          | 108         | 0.041      | 6            | 87           | 0.073      | 3            |              |

<sup>a</sup>  $M_X$  refers to median coverage of major chromosome arms at mapping quality  $\geq X$ .

<sup>b</sup>  $f_{0,X}$  refers to the fraction of the major arms with coverage of zero at mapping quality  $\geq X$ .

<sup>c</sup>  $Q_{1,X}$  refers to the first quantile of sites with coverage  $\geq 0$  and mapping quality  $\geq X$ . In other words, 99% of sites with coverage  $\geq 0$  have coverage  $\leq Q_{1,X}$ .

Table S5: Summary statistics of library insert sizes.

| Species                    | Sample <sup>a</sup>       | Median fragment size | 99.9 <sup>th</sup> quantile of fragment sizes |
|----------------------------|---------------------------|----------------------|-----------------------------------------------|
| <i>Drosophila simulans</i> | reference ( <i>w501</i> ) | 532                  | 593 <sup>b</sup>                              |
|                            | MD221                     | 318                  | 527                                           |
|                            | MD06                      | 319                  | 551                                           |
|                            | MD63                      | 302                  | 636                                           |
|                            | MD251                     | 325                  | 580                                           |
|                            | MD105                     | 316                  | 702                                           |
|                            | MD199                     | 344                  | 584                                           |
|                            | MD73                      | 317                  | 537                                           |
|                            | MD106                     | 319                  | 529                                           |
|                            | MD233                     | 301                  | 501                                           |
|                            | MD15                      | 313                  | 511                                           |
|                            | NS40                      | 316                  | 602                                           |
|                            | NS05                      | 324                  | 558                                           |
|                            | NS137                     | 317                  | 647                                           |
|                            | NS39                      | 318                  | 549                                           |
|                            | NS67                      | 314                  | 517                                           |
|                            | NS50                      | 330                  | 571                                           |
|                            | NS113                     | 334                  | 581                                           |
|                            | NS78                      | 326                  | 550                                           |
|                            | NS33                      | 327                  | 543                                           |
| NS79                       | 332                       | 562                  |                                               |
| <i>Drosophila yakuba</i>   | reference                 | 343                  | 565                                           |
|                            | CY20A                     | 336                  | 998                                           |
|                            | CY28                      | 308                  | 1,018                                         |
|                            | CY01A                     | 322                  | 1,124                                         |
|                            | CY02B5                    | 313                  | 1,183                                         |
|                            | CY04B                     | 327                  | 1,123                                         |
|                            | CY08A                     | 322                  | 1,338                                         |
|                            | CY13A                     | 316                  | 1,070                                         |
|                            | CY17C                     | 338                  | 1,102                                         |
|                            | CY21B3                    | 372                  | 1,226                                         |
|                            | CY22B                     | 328                  | 1,156                                         |
|                            | NY66-2                    | 313                  | 989                                           |
|                            | NY81                      | 326                  | 1,063                                         |
|                            | NY48                      | 322                  | 1,030                                         |
|                            | NY56                      | 332                  | 1,069                                         |
|                            | NY62                      | 319                  | 1,037                                         |
|                            | NY65                      | 341                  | 1,089                                         |
|                            | NY73                      | 325                  | 1,078                                         |
|                            | NY42                      | 270                  | 725                                           |
|                            | NY85                      | 326                  | 1,036                                         |
| NY141                      | 336                       | 1,061                |                                               |

<sup>a</sup> MD = Madagascar *D. simulans*, NS = Nairobi *D. simulans*, CY = Cameroon *D. yakuba*, and NY = Nairobi *D. yakuba*.

<sup>b</sup> For this sample, the actual value calculated from alignments was  $> 10^6$ . The value we used, which is shown in the table, is the mean value for the non-reference samples.

Table S6: Number of tandem duplications in sample strains.

| Species            | Strain | Duplications |
|--------------------|--------|--------------|
|                    | CY20A  | 145          |
|                    | CY28   | 160          |
|                    | CY01A  | 207          |
|                    | CY02B5 | 179          |
|                    | CY04B  | 154          |
|                    | CY08A  | 184          |
|                    | CY13A  | 159          |
|                    | CY17C  | 230          |
|                    | CY21B3 | 224          |
|                    | CY22B  | 136          |
|                    | NY66-2 | 134          |
|                    | NY81   | 126          |
|                    | NY48   | 106          |
|                    | NY56   | 81           |
|                    | NY62   | 154          |
|                    | NY65   | 107          |
|                    | NY73   | 100          |
|                    | NY42   | 138          |
|                    | NY85   | 169          |
|                    | NY141  | 121          |
|                    | std    | 40.22        |
|                    | mean   | 151.0        |
|                    | median | 154.0        |
| <i>D. simulans</i> | MD221  | 119          |
|                    | MD06   | 117          |
|                    | MD63   | 122          |
|                    | NS40   | 119          |
|                    | MD251  | 110          |
|                    | MD105  | 130          |
|                    | MD199  | 100          |
|                    | NS05   | 160          |
|                    | NS137  | 107          |
|                    | NS39   | 129          |
|                    | MD73   | 102          |
|                    | MD106  | 85           |
|                    | NS67   | 120          |
|                    | NS50   | 109          |
|                    | NS113  | 113          |
|                    | NS78   | 113          |
|                    | MD15   | 93           |
|                    | NS33   | 111          |
|                    | NS79   | 117          |
|                    | MD233  | 102          |
|                    | std    | 15.56        |
|                    | Mean   | 113.63       |
|                    | Median | 113.0        |



Table S7: Number of tandem duplications in sample and reference strains.

| Species            | Strain                  | Duplications |
|--------------------|-------------------------|--------------|
| <i>D. yakuba</i>   | reference               | 38           |
|                    | CY20A                   | 154          |
|                    | CY28                    | 170          |
|                    | CY01A                   | 225          |
|                    | CY025B                  | 187          |
|                    | CY04B                   | 172          |
|                    | CY08A                   | 201          |
|                    | CY13A                   | 168          |
|                    | CY17C                   | 248          |
|                    | CY21B3                  | 247          |
|                    | CY22B                   | 148          |
|                    | NY66-2                  | 151          |
|                    | NY81                    | 135          |
|                    | NY48                    | 107          |
|                    | NY56                    | 81           |
|                    | NY62                    | 166          |
|                    | NY65                    | 114          |
|                    | NY73                    | 114          |
|                    | NY42                    | 152          |
|                    | NY85                    | 182          |
| NY141              | 128                     |              |
|                    | mean                    | 162.5        |
|                    | median                  | 160          |
|                    | stdev                   | 43.53        |
| <i>D. simulans</i> | <i>w</i> <sup>501</sup> | 93           |
|                    | MD221                   | 171          |
|                    | MD06                    | 169          |
|                    | MD63                    | 180          |
|                    | MD251                   | 174          |
|                    | MD105                   | 195          |
|                    | MD199                   | 159          |
|                    | MD73                    | 165          |
|                    | MD106                   | 136          |
|                    | MD15                    | 141          |
|                    | NS40                    | 174          |
|                    | NS05                    | 219          |
|                    | NS137                   | 165          |
|                    | NS39                    | 187          |
|                    | NS67                    | 172          |
|                    | NS50                    | 164          |
|                    | NS113                   | 161          |
|                    | NS78                    | 166          |
|                    | NS33                    | 166          |
|                    | NS79                    | 170          |
| MD233              | 156                     |              |
|                    | mean                    | 165.86       |
|                    | median                  | 166          |
|                    | stdev                   | 23.44        |

Table S8: PacBio Confirmation

| Line   | Chromosome | Total | Confirmed |
|--------|------------|-------|-----------|
| CY17C  | 2L         | 41    | 40        |
|        | 2R         | 70    | 69        |
|        | 3L         | 38    | 36        |
|        | 3R         | 30    | 25        |
|        | X          | 48    | 46        |
|        | 4          | 3     | 3         |
| CY21B3 | 2L         | 53    | 43        |
|        | 2R         | 57    | 55        |
|        | 3L         | 34    | 34        |
|        | 3R         | 36    | 36        |
|        | X          | 43    | 43        |
|        | 4          | 1     | 1         |
| NY66-2 | 2L         | 28    | 26        |
|        | 2R         | 30    | 29        |
|        | 3L         | 17    | 16        |
|        | 3R         | 24    | 22        |
|        | X          | 33    | 33        |
|        | 4          | 2     | 2         |
| NY73   | 2L         | 19    | 16        |
|        | 2R         | 24    | 23        |
|        | 3L         | 21    | 20        |
|        | 3R         | 15    | 14        |
|        | X          | 21    | 18        |
|        | 4          | 0     | 0         |

Table S9: Fraction of genome covered in 3 or more reads in downsampled sequences of line CY17C

| Median coverage | Fraction Covered |
|-----------------|------------------|
| 15X             | 0.866            |
| 30X             | 0.898            |
| 45X             | 0.909            |
| 60X             | 0.914            |
| 75X             | 0.92             |
| 90X             | 0.92             |
| 105X            | 0.923            |
| 120X            | 0.923            |
| 135X            | 0.926            |
| 150X            | 0.928            |

Table S10:  $P$ -value for Fisher's Exact Test of PCR confirmation rates

| Study                | Confirmed | Total | <i>D. simulans</i> | <i>D. yakuba</i>        |
|----------------------|-----------|-------|--------------------|-------------------------|
| Emerson et al. 2008  | 64        | 74    | 0.7855             | $2.089 \times 10^{-5}$  |
| Cridland et al 2010  | 75        | 78    | 0.0319             | $1.642 \times 10^{-9}$  |
| Cardoso et al. 2011  | 18        | 24    | 0.5230             | 0.0725                  |
| Cardoso et al. 2012  | 32        | 32    | 0.0169             | $3.4194 \times 10^{-7}$ |
| Zichner et al. 2013  | 22        | 23    | 0.2422             | $1.1579 \times 10^{-4}$ |
| Schrider et al. 2013 | 7         | 19    | 0.0007             | 0.4165                  |

Table S11: PacBio Sequencing Reads

| Line   | Cell | Avg Length | Min Length | Max Length | Total Reads |
|--------|------|------------|------------|------------|-------------|
| CY17C  | 1    | 2424       | 50         | 21696      | 137839      |
| CY17C  | 2    | 2418       | 50         | 21680      | 134568      |
| CY17C  | 3    | 2175       | 50         | 19084      | 103354      |
| CY17C  | 4    | 2161       | 50         | 20519      | 112597      |
| CY17C  | 5    | 2148       | 50         | 18949      | 118144      |
| CY21B3 | 1    | 2571       | 50         | 24042      | 123592      |
| CY21B3 | 2    | 2549       | 50         | 22398      | 129855      |
| CY21B3 | 3    | 2224       | 50         | 22206      | 161532      |
| CY21B3 | 4    | 2152       | 50         | 20779      | 15733       |
| CY21B3 | 5    | 2060       | 50         | 18204      | 149234      |
| NY66-2 | 1    | 2556       | 50         | 22178      | 150291      |
| NY66-2 | 2    | 2485       | 50         | 21204      | 112095      |
| NY66-2 | 3    | 2648       | 50         | 21161      | 139571      |
| NY66-2 | 4    | 2059       | 50         | 20709      | 184485      |
| NY66-2 | 5    | 2699       | 50         | 22203      | 149048      |
| NY73   | 1    | 2269       | 50         | 17924      | 95028       |
| NY73   | 2    | 2200       | 50         | 17927      | 92587       |
| NY73   | 3    | 2175       | 50         | 17779      | 97116       |
| NY73   | 4    | 2137       | 50         | 19110      | 83372       |
| NY73   | 5    | 2175       | 50         | 19084      | 87212       |

Table S12: Direct repeats 300bp or larger within 25kb span in reference

| Species            | Chrom | Number |
|--------------------|-------|--------|
| <i>D. yakuba</i>   | 2L    | 13     |
|                    | 2R    | 10     |
|                    | 3L    | 41     |
|                    | 3R    | 43     |
|                    | X     | 13     |
| <i>D. simulans</i> | 2L    | 2      |
|                    | 2R    | 0      |
|                    | 3L    | 3      |
|                    | 3R    | 0      |
|                    | X     | 0      |

Table S13: Overrepresented GO categories among duplicated genes at EASE  $\geq 1.0$

| Species            | Functional Category                                | Group EASE score |
|--------------------|----------------------------------------------------|------------------|
| <i>D. yakuba</i>   | Alternative splicing                               | 3.54             |
|                    | Immunoglobulin and Fibronectin                     | 2.70             |
|                    | Chitins and aminoglycans                           | 2.00             |
|                    | Signal peptide or glycoprotein                     | 1.54             |
|                    | Immune response to wound healing                   | 1.44             |
|                    | Drug and hormone metabolism                        | 1.37             |
|                    | Extracellular matrix                               | 1.34             |
|                    | Immune response to pathogens                       | 1.17             |
|                    | Neurodevelopment and morphogenesis                 | 1.17             |
|                    | Chemotaxis                                         | 1.12             |
|                    | Chorion Development                                | 1.07             |
| <i>D. simulans</i> | Oxidation-reduction and secondary metabolites      | 2.63             |
|                    | Cytochromes, oxidoreductases, and toxin metabolism | 2.32             |
|                    | Lipases                                            | 1.61             |
|                    | Immune response to bacteria                        | 1.59             |
|                    | phospholipid metabolism                            | 1.45             |
|                    | Chemosensory processing                            | 1.37             |
|                    | Gultathion transferase and drug metabolism         | 1.21             |
|                    | Carboxylesterases                                  | 1.2              |
|                    | Sarcomeres                                         | 1.0              |
|                    | Cuticle development                                | 0.97             |
|                    | Endopeptidases                                     | 0.87             |

Table S14: Overrepresented GO categories in independently duplicated genes

| Multiple Independent Duplications |                                   |      |
|-----------------------------------|-----------------------------------|------|
| <i>D. yakuba</i>                  | Chorion Development and oogenesis | 1.79 |
|                                   | Cell signaling                    | 1.34 |
|                                   | Sensory processing                | 1.23 |
|                                   | Immune response                   | 1.11 |
|                                   | Development                       | 1.05 |
| <i>D. simulans</i>                | Immune Response to Bacteria       | 3.35 |
|                                   | Chorion Development and oogenesis | 1.84 |
|                                   | Organic Cation Membrane Transport | 1.48 |
|                                   | Chemosensory Perception           | 1.41 |



Table S15: Gene Duplications Identified at a Sample Frequency  $\geq \frac{17}{20}$

| Species            | Chrom | Start    | Stop     | Genes                                 | Ontologies                                                |
|--------------------|-------|----------|----------|---------------------------------------|-----------------------------------------------------------|
| <i>D. yakuba</i>   | 2L    | 20867709 | 20868709 | <i>GE19441</i>                        | cation transport                                          |
|                    | 2L    | 4561989  | 4563943  | <i>GE14706</i>                        | Epidermal growth factor; Follistatin-like; Zona pellucida |
|                    | 2R    | 1192252  | 1198186  | <i>GE12923</i>                        | Adenyl cyclase                                            |
|                    | 2R    | 8627195  | 8631730  | <i>GE13451, GE13452</i>               | AMP dependent ligases or synthetases                      |
|                    | 2R    | 9718894  | 9722579  | <i>GE12353, GE12354, GE13533</i>      | serine-type endopeptidases                                |
|                    | 2L    | 22229672 | 22240590 | -                                     | -                                                         |
|                    | 2R    | 2456185  | 2468412  | -                                     | -                                                         |
|                    | 2R    | 550564   | 555698   | -                                     | -                                                         |
|                    | X     | 2263061  | 2263383  | -                                     | -                                                         |
|                    | X     | 6027171  | 6028326  | -                                     | -                                                         |
|                    | 3L    | 6853202  | 6857398  | -                                     | -                                                         |
|                    | 3L    | 1631349  | 1632283  | -                                     | -                                                         |
|                    | 3R    | 28797150 | 28798631 | -                                     | -                                                         |
| <i>D. simulans</i> | 2L    | 15442908 | 15460870 | <i>CG7653</i>                         | aminopeptidase; male reproduction                         |
|                    | 2R    | 19220441 | 19221209 | <i>CG3510</i>                         | mitotic spindle movement and cytokinesis                  |
|                    | 2R    | 6705454  | 6706432  | <i>CG18445</i>                        | cellular calcium homeostasis, adult lifespan              |
|                    | 3L    | 1138079  | 1141222  | <i>CG1179</i>                         | antimicrobial response                                    |
|                    | 3L    | 1138061  | 1151515  | <i>CG9116, CG1165, CG1180, CG1179</i> | antimicrobial response                                    |
|                    | 3R    | 12694264 | 12697515 | <i>CG11600, CG11598, CG11608</i>      | lipase; accessory gland                                   |
|                    | X     | 10711505 | 10714527 | <i>CG1725</i>                         | development and morphogenesis                             |
|                    | X     | 815864   | 816572   | <i>CG11638</i>                        | EF-hand-like domain                                       |
|                    | X     | 3859088  | 3860485  | <i>CG12691</i>                        | no data                                                   |
|                    | X     | 4216151  | 4218438  | <i>CG12179, CG12184</i>               | no data                                                   |
|                    | 2L    | 22881359 | 22884258 | -                                     | -                                                         |
|                    | 2R    | 1782843  | 1783435  | -                                     | -                                                         |
|                    | 2R    | 1849682  | 1858187  | -                                     | -                                                         |
|                    | 2R    | 368797   | 369174   | -                                     | -                                                         |
|                    | 2R    | 6769473  | 6770112  | -                                     | -                                                         |
|                    | 3L    | 16974345 | 16975592 | -                                     | -                                                         |
|                    | 3L    | 23132385 | 23145527 | -                                     | -                                                         |
|                    | 3L    | 23499705 | 23500091 | -                                     | -                                                         |
|                    | X     | 10810038 | 10810658 | -                                     | -                                                         |
|                    | X     | 14784709 | 14784963 | -                                     | -                                                         |
|                    | X     | 1942550  | 1943315  | -                                     | -                                                         |
|                    | X     | 20173558 | 20177752 | -                                     | -                                                         |
|                    | X     | 3953557  | 3954555  | -                                     | -                                                         |
|                    | X     | 4353206  | 4354968  | -                                     | -                                                         |
|                    | X     | 7149884  | 7152082  | -                                     | -                                                         |

Table S16: Recruited Non-Coding Sequence in *D. yakuba* I

| Type                 | Gene    | Chrom | Start    | Stop     | Strand | Strains |
|----------------------|---------|-------|----------|----------|--------|---------|
| Recruited Non-Coding | GE18269 | 2L    | 4024479  | 4026346  | +      | 1       |
|                      | GE11906 | 2R    | 15447621 | 15450093 | -      | 1       |
|                      | GE13954 | 2R    | 15422288 | 15424931 | +      | 1       |
|                      | GE10773 | 2L    | 11412985 | 11416198 | -      | 1       |
|                      | GE12793 | 2R    | 3641829  | 3654689  | -      | 1       |
|                      | GE20665 | 3L    | 4498924  | 4499419  | -      | 1       |
|                      | GE20642 | 3L    | 4748069  | 4750627  | -      | 1       |
|                      | GE12985 | 2R    | 1220523  | 1223522  | +      | 3       |
|                      | GE25403 | 3R    | 456693   | 474667   | +      | 3       |
|                      | GE14641 | 2L    | 5056039  | 5058911  | -      | 1       |
|                      | GE24887 | 3R    | 7559447  | 7567609  | -      | 1       |
|                      | GE18834 | 2L    | 12012286 | 12013371 | +      | 1       |
|                      | GE14103 | 2R    | 17064455 | 17068625 | +      | 1       |
|                      | GE14204 | 2R    | 18340872 | 18341767 | +      | 6       |
|                      | GE19947 | 3L    | 15944998 | 15948170 | -      | 2       |
|                      | GE13585 | 2R    | 10199336 | 10208268 | +      | 1       |
|                      | GE17610 | X     | 15169824 | 15171000 | +      | 1       |
|                      | GE13833 | 2R    | 13593056 | 13597666 | +      | 1       |
|                      | GE12921 | 2R    | 1296122  | 1299376  | -      | 4       |
|                      | GE22103 | 3L    | 16172247 | 16172603 | +      | 2       |
|                      | GE20019 | 3L    | 14602982 | 14605035 | -      | 1       |
|                      | GE13348 | 2R    | 7486324  | 7489683  | +      | 1       |
|                      | GE23504 | 3R    | 26016459 | 26016872 | -      | 2       |
|                      | GE26314 | 3R    | 14152097 | 14152483 | +      | 1       |
|                      | GE17862 | X     | 19312815 | 19315826 | +      | 1       |
|                      | GE12906 | 2R    | 1569408  | 1572051  | -      | 1       |
|                      | GE24569 | 3R    | 12091442 | 12096476 | -      | 1       |
|                      | GE23710 | 3R    | 23607275 | 23608177 | -      | 1       |
|                      | GE19620 | 3L    | 20846937 | 20859977 | -      | 1       |
|                      | GE14485 | 4     | 1300833  | 1304379  | -      | 1       |
|                      | GE24349 | 3R    | 14703209 | 14705506 | -      | 1       |
|                      | GE23444 | 3R    | 26616440 | 26618338 | -      | 1       |
|                      | GE12929 | 2R    | 921000   | 926017   | -      | 1       |
|                      | GE14093 | 2R    | 16915401 | 16922730 | +      | 1       |
|                      | GE18272 | 2L    | 4137997  | 4143127  | +      | 1       |
|                      | GE16590 | X     | 157495   | 158134   | -      | 1       |
|                      | GE18174 | 2L    | 2726172  | 2731718  | +      | 1       |
|                      | GE13324 | 2R    | 7085103  | 7088180  | +      | 1       |
|                      | GE19465 | 2L    | 22202637 | 22205208 | +      | 1       |
|                      | GE23519 | 2L    | 16475111 | 16476986 | -      | 1       |
|                      | GE21452 | 3L    | 5038513  | 5043130  | +      | 1       |
|                      | GE13128 | 2R    | 3600589  | 3603993  | +      | 1       |
|                      | GE19410 | 2L    | 20057880 | 20060145 | +      | 1       |
|                      | GE11423 | 2R    | 20547562 | 20548621 | -      | 1       |
|                      | GE24770 | 3R    | 9392640  | 9392863  | -      | 4       |
|                      | GE20162 | 3L    | 11976337 | 11979310 | -      | 1       |
|                      | GE25302 | 3R    | 1445612  | 1450376  | -      | 1       |
|                      | GE21054 | 3L    | 115270   | 118715   | +      | 1       |

Table S17: Recruited Non-Coding Sequence in *D. yakuba* II

| Type                 | Gene    | Chrom    | Start    | Stop     | Strand | Strains |
|----------------------|---------|----------|----------|----------|--------|---------|
| Recruited Non-Coding | GE16460 | 2L       | 108667   | 108970   | -      | 1       |
|                      | GE13445 | 2R       | 8579441  | 8581528  | +      | 2       |
|                      | GE13294 | 2R       | 6537075  | 6541877  | +      | 1       |
|                      | GE18814 | 2L       | 11619990 | 11635209 | +      | 1       |
|                      | GE18468 | 2L       | 6924773  | 6926435  | +      | 1       |
|                      | GE18653 | 2L       | 9824910  | 9828235  | +      | 1       |
|                      | GE12963 | 2R       | 363102   | 367650   | +      | 2       |
|                      | GE21059 | 3L       | 156476   | 159503   | +      | 1       |
|                      | GE19269 | 2L       | 17827409 | 17829872 | +      | 1       |
|                      | GE26141 | 2L       | 12979610 | 12983013 | -      | 1       |
|                      | GE19225 | 2L       | 17288040 | 17288648 | +      | 1       |
|                      | GE21286 | 3L       | 3185710  | 3196869  | +      | 2       |
|                      | GE10233 | 3R       | 18382396 | 18384823 | +      | 6       |
|                      | GE12947 | 2R       | 392470   | 401311   | -      | 1       |
|                      | GE19172 | 2L       | 16627714 | 16628834 | +      | 1       |
|                      | GE13092 | 2R       | 2741691  | 2741955  | +      | 1       |
|                      | GE24207 | 3R       | 16710156 | 16712312 | -      | 1       |
|                      | GE14560 | 4        | 808540   | 816641   | +      | 1       |
|                      | GE18453 | 2L       | 6552459  | 6556843  | +      | 1       |
|                      | GE11989 | 2L       | 9417833  | 9419230  | -      | 1       |
|                      | GE12986 | 2R       | 1265746  | 1283900  | +      | 1       |
|                      | GE14704 | 2L       | 4595905  | 4603145  | -      | 1       |
|                      | GE10115 | 2L       | 12647621 | 12647846 | -      | 1       |
|                      | GE21984 | 2L       | 18369608 | 18370669 | -      | 1       |
|                      | GE12947 | 2R       | 385328   | 401500   | -      | 1       |
|                      | GE13641 | 2R       | 11060164 | 11061595 | +      | 2       |
|                      | GE23918 | 3R       | 20559041 | 20560656 | -      | 2       |
|                      | GE24208 | 3R       | 16678984 | 16680305 | -      | 1       |
|                      | GE13389 | 2R       | 7860267  | 7865453  | +      | 1       |
|                      | GE15418 | X        | 18564946 | 18568426 | -      | 1       |
|                      | GE17176 | X        | 9412662  | 9415570  | +      | 1       |
|                      | GE21334 | 3L       | 3723736  | 3727362  | +      | 1       |
|                      | GE26071 | 3R       | 11008671 | 11012107 | +      | 2       |
|                      | GE16233 | X        | 6345642  | 6350148  | -      | 1       |
|                      | GE10260 | 3R       | 18673427 | 18675156 | +      | 1       |
|                      | GE15086 | 2L       | 2556400  | 2557925  | -      | 1       |
|                      | GE14314 | 2R       | 19547242 | 19551254 | +      | 1       |
|                      | GE14531 | 4        | 41861    | 42853    | -      | 1       |
|                      | GE17162 | X        | 9152733  | 9154332  | +      | 1       |
|                      | GE19996 | 3L       | 15023729 | 15026407 | -      | 5       |
|                      | GE25401 | 3R       | 444738   | 446198   | +      | 1       |
|                      | GE10771 | 3R       | 25846233 | 25849137 | +      | 1       |
|                      | GE18000 | 3L       | 18980225 | 18991194 | -      | 3       |
| GE12947              | 2R      | 385387   | 401772   | -        | 1      |         |
| GE15364              | X       | 19336095 | 19338151 | -        | 1      |         |
| GE13453              | 2R      | 8628288  | 8637097  | +        | 6      |         |

Table S18: Recruited Non-Coding Sequence in *D. simulans* I

| Type                 | Gene    | Chrom | Start    | Stop     | Strand | Strains |
|----------------------|---------|-------|----------|----------|--------|---------|
| Recruited Non-Coding | CG5939  | 3L    | 8520531  | 8500705  | -      | 1       |
|                      | CG3955  | 2R    | 9687651  | 9686889  | -      | 2       |
|                      | CG30030 | 2R    | 7961858  | 7960689  | +      | 1       |
|                      | CG5925  | 3R    | 12851812 | 12842698 | -      | 1       |
|                      | CG3823  | X     | 5828413  | 5826778  | +      | 1       |
|                      | CG15252 | X     | 9410423  | 9407893  | -      | 1       |
|                      | CG12487 | 3L    | 14581107 | 14579140 | -      | 8       |
|                      | CG4004  | X     | 11999000 | 11996338 | +      | 2       |
|                      | CG3919  | 3L    | 14069074 | 14065733 | +      | 1       |
|                      | CG9692  | 3L    | 16291819 | 16289912 | +      | 1       |
|                      | CG7058  | X     | 17623953 | 17619037 | +      | 1       |
|                      | CG8859  | 2R    | 8781970  | 8776750  | -      | 2       |
|                      | CG10251 | 3R    | 19075153 | 19071626 | -      | 1       |
|                      | CG5685  | 3R    | 4469843  | 4462120  | -      | 1       |
|                      | CG31536 | 3R    | 697054   | 692538   | +      | 1       |
|                      | CG12691 | X     | 3860485  | 3859088  | +      | 18      |
|                      | CG5659  | X     | 17126212 | 17124294 | -      | 1       |
|                      | CG7678  | 3R    | 7067181  | 7063437  | +      | 1       |
|                      | CG18063 | 2L    | 15538184 | 15535240 | +      | 2       |
|                      | CG9431  | 2L    | 12835101 | 12832723 | -      | 1       |
|                      | CG4572  | 3R    | 5597362  | 5594122  | +      | 1       |
|                      | CG31450 | 3R    | 16589187 | 16588657 | +      | 1       |
|                      | CG2174  | X     | 10322987 | 10304124 | +      | 1       |
|                      | CG6134  | 3R    | 22342992 | 22341162 | -      | 1       |
|                      | CG3210  | 2L    | 2472529  | 2463036  | -      | 1       |
|                      | CG6308  | X     | 14530096 | 14528791 | +      | 1       |
|                      | CG1851  | 2R    | 3965243  | 3961574  | -      | 1       |
|                      | CG3208  | X     | 5145948  | 5145204  | -      | 6       |
|                      | CG13350 | 2R    | 10556652 | 10549764 | -      | 4       |
|                      | CG3647  | 2L    | 14671041 | 14666003 | +      | 1       |
|                      | CG7914  | X     | 17986800 | 17986419 | -      | 1       |
|                      | CG6643  | 3R    | 19913528 | 19912399 | +      | 2       |
|                      | CG6416  | 3L    | 8421994  | 8418765  | +      | 1       |
|                      | CG17446 | X     | 8714153  | 8711653  | -      | 1       |
|                      | CG3558  | 2L    | 2878467  | 2874676  | +      | 1       |
|                      | CG5939  | 3L    | 8521640  | 8500872  | -      | 1       |
|                      | CG10240 | 2R    | 11466660 | 11464170 | +      | 1       |
|                      | CG17927 | 2L    | 16357771 | 16354240 | +      | 1       |
|                      | CG13658 | 3R    | 20627528 | 20624799 | +      | 1       |
|                      | CG14724 | 3R    | 13454925 | 13451797 | -      | 1       |
|                      | CG42575 | 3L    | 10870586 | 10866452 | +      | 3       |
|                      | CG9689  | X     | 9313627  | 9312603  | +      | 1       |
|                      | CG12184 | X     | 4215528  | 4213588  | -      | 1       |
|                      | CG1486  | X     | 19933936 | 19931912 | +      | 1       |
|                      | CG17510 | 2R    | 2451922  | 2448224  | -      | 2       |
|                      | CG12065 | X     | 8054167  | 8053646  | +      | 1       |
|                      | CG1179  | 3L    | 1141222  | 1138079  | +      | 20      |
|                      | CG5939  | 3L    | 8520189  | 8500848  | -      | 1       |
|                      | CG32703 | X     | 8703815  | 8700230  | -      | 2       |

Table S19: Recruited Non-Coding Sequence in *D. simulans* II

| Type                 | Gene    | Chrom | Start    | Stop     | Strand | Strains |
|----------------------|---------|-------|----------|----------|--------|---------|
| Recruited Non-Coding | CG33223 | X     | 7929354  | 7921199  | -      | 6       |
|                      | CG31705 | 2L    | 11219262 | 11213928 | -      | 2       |
|                      | CG4335  | 3R    | 5071920  | 5071599  | +      | 1       |
|                      | CG5939  | 3L    | 8522666  | 8500416  | -      | 1       |
|                      | CG9914  | X     | 15320652 | 15317592 | -      | 1       |
|                      | CG40486 | X     | 20790004 | 20788766 | -      | 1       |
|                      | CG6667  | 2L    | 16997487 | 16991856 | -      | 1       |
|                      | CG5772  | 2L    | 9867394  | 9858502  | -      | 1       |
|                      | CG5939  | 3L    | 8526072  | 8502756  | -      | 1       |
|                      | CG6680  | 3L    | 19904005 | 19895648 | +      | 2       |
|                      | CG17921 | 2R    | 18143092 | 18133788 | -      | 1       |
|                      | CG5939  | 3L    | 8521943  | 8500015  | -      | 1       |
|                      | CG31118 | 3R    | 20168765 | 20167250 | -      | 15      |
|                      | CG32452 | 3L    | 22218538 | 22215418 | +      | 3       |
|                      | CG6203  | 3R    | 15121661 | 15121183 | +      | 1       |
|                      | CG7398  | 3L    | 6104564  | 6098227  | +      | 1       |
|                      | CG31164 | 3R    | 17481879 | 17479404 | +      | 1       |
|                      | CG3726  | X     | 5475457  | 5471459  | +      | 4       |
|                      | CG34454 | 3L    | 202674   | 199394   | -      | 1       |
|                      | CG9380  | 2R    | 21517959 | 21517361 | -      | 1       |
|                      | CG13225 | 2R    | 7858337  | 7855361  | +      | 8       |
|                      | CG6511  | 3L    | 8513193  | 8508493  | +      | 1       |
|                      | CG1165  | 3L    | 1142790  | 1141414  | -      | 14      |
|                      | CG5409  | 2R    | 13335070 | 13334296 | +      | 1       |
|                      | CG1925  | 2R    | 4531779  | 4527304  | +      | 1       |
|                      | CG11158 | X     | 12915981 | 12913430 | +      | 1       |
|                      | CG1179  | 3L    | 1151515  | 1138061  | +      | 20      |
|                      | CG9126  | X     | 14999000 | 14996974 | -      | 1       |
|                      | CG11030 | 2L    | 5566837  | 5563794  | +      | 1       |
|                      | CG13225 | 2R    | 7859420  | 7856642  | +      | 2       |
|                      | CG8887  | 3L    | 19234359 | 19234240 | -      | 1       |
|                      | CG11325 | 2L    | 6485615  | 6483354  | -      | 1       |
|                      | CG2174  | X     | 10323004 | 10304482 | +      | 4       |
|                      | CG4026  | 2L    | 9474185  | 9468950  | +      | 8       |
|                      | CG4937  | X     | 15950724 | 15945545 | +      | 1       |
|                      | CG5939  | 3L    | 8521697  | 8497398  | -      | 1       |
|                      | CG14803 | X     | 1624945  | 1623645  | +      | 1       |
|                      | CG6231  | 3R    | 5832844  | 5822195  | +      | 2       |
|                      | CG33223 | X     | 7930084  | 7921981  | -      | 1       |
|                      | CG2174  | X     | 10323255 | 10302508 | +      | 1       |
|                      | CG10146 | 2R    | 11339645 | 11337864 | +      | 2       |
|                      | CG9331  | 2L    | 20280987 | 20279429 | +      | 1       |
|                      | CG5939  | 3L    | 8519186  | 8500624  | -      | 1       |
|                      | CG9761  | 3R    | 493871   | 486754   | -      | 1       |
|                      | CG4086  | 3L    | 16204452 | 16202997 | -      | 1       |
|                      | CG5939  | 3L    | 8519120  | 8497461  | -      | 1       |
|                      | CG30497 | 2R    | 4466546  | 4459504  | -      | 1       |

Table S20: Putative Dual Promoter Genes in *D. yakuba*

| Type          | 5' Gene | 3' Gene | Chrom | Start    | Stop     | Strand | Strains |
|---------------|---------|---------|-------|----------|----------|--------|---------|
| Dual Promoter | GE25749 | GE24961 | 3R    | 6426573  | 6429128  |        | 1       |
|               | GE17248 | GE15994 | X     | 10111434 | 10113143 |        | 1       |
|               | GE25858 | GE24866 | 3R    | 8159079  | 8162914  |        | 1       |
|               | GE21080 | GE21031 | 3L    | 282949   | 286511   |        | 1       |
|               | GE10392 | GE23928 | 3R    | 20485903 | 20487331 |        | 1       |
|               | GE19241 | GE22696 | 2L    | 17479513 | 17482694 |        | 1       |
|               | GE10859 | GE23415 | 3R    | 26875286 | 26881333 |        | 1       |
|               | GE26132 | GE24588 | 3R    | 11912024 | 11916314 |        | 3       |
|               | GE17889 | GE15249 | 2L    | 2014960  | 2019346  |        | 1       |
|               | GE14337 | GE11513 | 2R    | 19768417 | 19770224 |        | 1       |
|               | GE16626 | GE16372 | 2L    | 146434   | 147628   |        | 1       |
|               | GE13245 | GE12657 | 2R    | 5880254  | 5883193  |        | 1       |
|               | GE14570 | GE14484 | 4     | 1314161  | 1319175  |        | 1       |
|               | GE16771 | GE16447 | X     | 2623733  | 2628942  |        | 1       |
|               | GE14002 | GE11855 | 2R    | 15989525 | 15990929 |        | 1       |
|               | GE13989 | GE11866 | 2R    | 15777997 | 15781002 |        | 1       |
|               | GE25878 | GE24850 | 3R    | 8267252  | 8270103  |        | 1       |
|               | GE10233 | GE24091 | 3R    | 18383837 | 18386578 |        | 2       |
|               | GE18995 | GE25461 | 2L    | 13658567 | 13660529 |        | 4       |
|               | GE13812 | GE12098 | 2R    | 13042582 | 13049000 |        | 1       |
|               | GE13138 | GE12791 | 2R    | 3686554  | 3691429  |        | 3       |
|               | GE21885 | GE20148 | 3L    | 12173462 | 12175684 |        | 1       |
|               | GE17429 | GE15699 | 2L    | 1162125  | 1162631  |        | 1       |
|               | GE19355 | GE21644 | 2L    | 18836291 | 18841517 |        | 1       |
|               | GE14442 | GE11414 | 2R    | 20628266 | 20630184 |        | 1       |
|               | GE13815 | GE12096 | 2R    | 13052601 | 13054893 |        | 1       |
|               | GE17290 | GE15947 | X     | 10693772 | 10694086 |        | 2       |
|               | GE18487 | GE13339 | 2L    | 7166837  | 7171789  |        | 1       |
|               | GE19240 | GE22696 | 2L    | 17477743 | 17483758 |        | 3       |
|               | GE26291 | GE24418 | 3R    | 13841865 | 13844988 |        | 1       |
|               | GE21597 | GE20441 | 3L    | 7731981  | 7736528  |        | 1       |
|               | GE13211 | GE12702 | 2R    | 5347302  | 5349788  |        | 2       |
|               | GE26230 | GE24475 | 3R    | 13110215 | 13112850 |        | 1       |
|               | GE13929 | GE11929 | 2R    | 15128544 | 15131155 |        | 1       |
|               | GE21085 | GE21022 | 3L    | 343902   | 348093   |        | 1       |
|               | GE10951 | GE23313 | 3R    | 28355223 | 28357215 |        | 1       |
|               | GE26060 | GE24657 | 3R    | 10734970 | 10739334 |        | 1       |
|               | GE16619 | GE16580 | X     | 349074   | 349922   |        | 1       |
|               | GE13338 | GE12567 | 2R    | 7221214  | 7224978  |        | 1       |
|               | GE25687 | GE25035 | 3R    | 5444807  | 5445189  |        | 1       |

Table S21: Putative Dual Promoter Genes in *D. simulans* I

| Type          | 5' Gene | 3' Gene | Chrom | Start    | Stop     | Strand | Strains |
|---------------|---------|---------|-------|----------|----------|--------|---------|
| Dual Promoter | CG4433  | CG4845  | 3R    | 5438512  | 5436655  |        | 1       |
|               | CG10086 | CG18748 | 3R    | 3506551  | 3501272  |        | 1       |
|               | CG12230 | CG3917  | X     | 18350597 | 18348732 |        | 1       |
|               | CG9506  | CG9500  | 2L    | 6166401  | 6152814  |        | 1       |
|               | CG7034  | CG5760  | 3R    | 4371721  | 4366499  |        | 1       |
|               | CG13472 | CG5295  | 3L    | 14429033 | 14427393 |        | 1       |
|               | CG3423  | CG9211  | 2L    | 6722948  | 6714828  |        | 1       |
|               | CG5588  | CG5611  | 3R    | 22888188 | 22885586 |        | 1       |

Table S22: Putative Chimeric Genes in *D. yakuba* I

| Type     | 5' Gene | 3' Gene | Chrom | Start    | Stop     | Strand | Strains |
|----------|---------|---------|-------|----------|----------|--------|---------|
| Chimeric | GE18811 | GE18814 | 2L    | 11624699 | 11635716 | +      | 2       |
|          | GE12444 | GE12447 | 2R    | 8682740  | 8684098  | -      | 1       |
|          | GE12828 | GE12831 | 2R    | 2621213  | 2625329  | -      | 5       |
|          | GE21209 | GE21211 | 3L    | 2196531  | 2199567  | +      | 1       |
|          | GE16478 | GE16479 | X     | 2094815  | 2098815  | -      | 1       |
|          | GE12441 | GE12442 | 2R    | 8693878  | 8697950  | -      | 16      |
|          | GE25203 | GE25214 | 2L    | 14060529 | 14065910 | -      | 1       |
|          | GE19619 | GE19620 | 3L    | 20848448 | 20861465 | -      | 1       |
|          | GE10625 | GE10626 | 3R    | 24047193 | 24049829 | +      | 1       |
|          | GE19343 | GE19344 | 2L    | 18662414 | 18663086 | +      | 1       |
|          | GE13385 | GE13386 | 2R    | 7858807  | 7861090  | +      | 2       |
|          | GE17209 | GE17211 | X     | 9829925  | 9831752  | +      | 1       |
|          | GE19944 | GE19947 | 3L    | 15944832 | 15946907 | -      | 1       |
|          | GE12275 | GE12276 | 2R    | 10705351 | 10711729 | -      | 10      |
|          | GE16764 | GE16765 | X     | 2538959  | 2540881  | +      | 3       |
|          | GE23781 | GE23782 | 3R    | 22385664 | 22386968 | -      | 2       |
|          | GE14304 | GE14305 | 2R    | 19416793 | 19423595 | +      | 1       |
|          | GE26358 | GE26359 | 3R    | 14778214 | 14779539 | +      | 1       |
|          | GE10773 | GE10784 | 2L    | 11411312 | 11413493 | -      | 1       |
|          | GE21046 | GE21047 | 3L    | 153714   | 155228   | -      | 1       |
|          | GE18427 | GE18428 | 2L    | 6328720  | 6335333  | +      | 1       |
|          | GE15774 | GE15775 | X     | 13146906 | 13148951 | -      | 1       |
|          | GE13156 | GE13157 | 2R    | 4244726  | 4248299  | +      | 1       |
|          | GE13078 | GE13079 | 2R    | 2529175  | 2532039  | +      | 1       |
|          | GE18932 | GE18933 | 2L    | 13058912 | 13060325 | +      | 1       |
|          | GE18810 | GE18812 | 2L    | 11616544 | 11627893 | +      | 8       |
|          | GE15105 | GE15108 | 2L    | 2406236  | 2408538  | -      | 1       |
|          | GE23853 | GE23854 | 3R    | 21163271 | 21166358 | -      | 1       |
|          | GE26117 | GE26119 | 3R    | 11563789 | 11567495 | +      | 1       |
|          | GE12353 | GE12354 | 2R    | 9718894  | 9722579  | -      | 19      |
|          | GE19681 | GE19682 | 3L    | 20114778 | 20124632 | -      | 1       |
|          | GE21817 | GE21818 | 3L    | 11535053 | 11537096 | +      | 1       |
|          | GE25203 | GE25214 | 2L    | 14060197 | 14065508 | -      | 1       |
|          | GE21123 | GE21125 | 3L    | 1172484  | 1179048  | +      | 1       |
|          | GE10460 | GE10461 | 3R    | 21424020 | 21428007 | +      | 7       |
|          | GE12766 | GE12767 | 2R    | 4305793  | 4310361  | -      | 1       |
|          | GE10682 | GE10684 | 3R    | 25036642 | 25044043 | +      | 4       |
|          | GE14192 | GE14193 | 2R    | 18131313 | 18134201 | +      | 1       |
|          | GE20247 | GE20248 | 3L    | 11082344 | 11085513 | -      | 8       |
|          | GE14235 | GE14236 | 2R    | 18687558 | 18689712 | +      | 4       |
|          | GE24523 | GE24524 | 3R    | 12546325 | 12548762 | -      | 1       |
|          | GE12451 | GE12452 | 2R    | 8660527  | 8664855  | -      | 1       |
|          | GE14191 | GE14192 | 2R    | 18127656 | 18131007 | +      | 1       |
|          | GE26194 | GE26195 | 3R    | 12581548 | 12584840 | +      | 5       |
|          | GE13732 | GE13734 | 2R    | 12089189 | 12095200 | +      | 1       |
|          | GE15325 | GE15326 | X     | 20043093 | 20045334 | -      | 1       |
|          | GE13428 | GE13439 | 2L    | 7100699  | 7103913  | -      | 1       |



Table S23: Putative Chimeric Genes in *D. yakuba* II

| Type     | Gene    | Chrom   | Start | Stop     | Strand   | Strains |    |
|----------|---------|---------|-------|----------|----------|---------|----|
| Chimeric | GE11692 | GE11693 | 2R    | 17841057 | 17843909 | -       | 4  |
|          | GE16094 | GE16096 | X     | 8950320  | 8954906  | -       | 12 |
|          | GE10460 | GE10461 | 3R    | 21423681 | 21427312 | +       | 2  |
|          | GE23849 | GE23860 | 2L    | 16088829 | 16091980 | -       | 1  |
|          | GE10382 | GE10383 | 3R    | 20409220 | 20411134 | +       | 1  |
|          | GE21851 | GE21854 | 3L    | 11841757 | 11854748 | +       | 13 |
|          | GE23589 | GE23592 | 3R    | 25372683 | 25379092 | -       | 5  |
|          | GE19428 | GE19429 | 2L    | 20518336 | 20525187 | +       | 1  |
|          | GE12481 | GE12482 | 2R    | 8432422  | 8439919  | -       | 4  |
|          | GE16583 | GE16584 | X     | 303209   | 310866   | -       | 1  |
|          | GE25989 | GE25990 | 3R    | 9654460  | 9658865  | +       | 1  |
|          | GE20212 | GE20213 | 3L    | 11535513 | 11537526 | -       | 1  |
|          | GE18810 | GE18811 | 2L    | 11616597 | 11622870 | +       | 1  |
|          | GE26258 | GE26259 | 3R    | 13421611 | 13426161 | +       | 1  |
|          | GE13653 | GE13654 | 2R    | 11216791 | 11218480 | +       | 1  |
|          | GE18474 | GE18475 | 2L    | 7043543  | 7048586  | +       | 5  |
|          | GE15105 | GE15108 | 2L    | 2405167  | 2407381  | -       | 3  |
|          | GE11452 | GE11454 | 2R    | 20345528 | 20347724 | -       | 2  |
|          | GE13618 | GE13619 | 2R    | 10699218 | 10701733 | +       | 8  |
|          | GE10109 | GE10110 | 3R    | 17036248 | 17039632 | +       | 1  |
|          | GE11708 | GE11711 | 2R    | 17603369 | 17607091 | -       | 1  |
|          | GE11640 | GE11641 | 2R    | 18527790 | 18532538 | -       | 1  |
|          | GE13733 | GE13734 | 2R    | 12091221 | 12095128 | +       | 7  |
|          | GE16141 | GE16142 | X     | 7932016  | 7934615  | -       | 1  |
|          | GE22398 | GE22399 | 3L    | 20111729 | 20121616 | +       | 1  |
|          | GE21366 | GE21367 | 3L    | 4011112  | 4013997  | +       | 1  |
|          | GE18810 | GE18814 | 2L    | 11616623 | 11633710 | +       | 1  |
|          | GE18648 | GE18649 | 2L    | 9807924  | 9808680  | +       | 1  |
|          | GE18812 | GE18814 | 2L    | 11628837 | 11634750 | +       | 1  |
|          | GE18811 | GE18812 | 2L    | 11623999 | 11627896 | +       | 1  |
|          | GE25583 | GE25584 | 3R    | 3641910  | 3644927  | +       | 1  |

Table S24: Putative Chimeric Genes in *D. simulans*

| Type     | 5' Gene | 3' Gene | Chrom | Start    | Stop     | Strand | Strains |
|----------|---------|---------|-------|----------|----------|--------|---------|
| Chimeric | CG11608 | CG11598 | 3R    | 12697515 | 12694264 | -      | 20      |
|          | CG10243 | CG10240 | 2R    | 11467239 | 11463409 | +      | 1       |
|          | CG3523  | CG3524  | 2L    | 2944012  | 2931797  | +      | 6       |
|          | CG33162 | CG5939  | 3L    | 8516515  | 8502674  | -      | 2       |
|          | CG10958 | CG2116  | X     | 7600264  | 7599314  | +      | 1       |
|          | CG6607  | CG13618 | 3R    | 19885309 | 19882164 | +      | 3       |
|          | CG17970 | CG14032 | 2L    | 5075704  | 5069930  | +      | 1       |
|          | CG32261 | CG1134  | 3L    | 3915856  | 3910469  | +      | 1       |
|          | CG15797 | CG17754 | X     | 8697294  | 8694573  | +      | 1       |
|          | CG18330 | CG1049  | 3L    | 1464803  | 1462282  | +      | 2       |
|          | CG10246 | CG10247 | 2R    | 11475068 | 11469403 | -      | 1       |
|          | CG6533  | CG6511  | 3L    | 8514363  | 8506572  | +      | 1       |
|          | CG2071  | CG1304  | X     | 19554392 | 19552342 | -      | 1       |
|          | CG4231  | CG12193 | 2L    | 1461505  | 1459358  | +      | 1       |
|          | CG33162 | CG5939  | 3L    | 8517417  | 8502361  | -      | 1       |
|          | CG33162 | CG5939  | 3L    | 8519388  | 8502448  | -      | 1       |
|          | CG18779 | CG10534 | 3L    | 6035588  | 6032981  | -      | 5       |
|          | CG13946 | CG12506 | 2L    | 739495   | 736512   | +      | 1       |
|          | CG13160 | CG33012 | 2R    | 8966253  | 8961795  | +      | 1       |
|          | CG4215  | CG7480  | 2L    | 13945968 | 13940471 | +      | 1       |
|          | CG32257 | CG32261 | 3L    | 3917056  | 3916219  | +      | 1       |
|          | CG2767  | CG11052 | 3R    | 3721593  | 3720813  | -      | 1       |
|          | CG33013 | CG30043 | 2R    | 8957288  | 8953622  | +      | 1       |
|          | CG32383 | CG32382 | 3L    | 7299216  | 7297924  | -      | 1       |
|          | CG32252 | CG15009 | 3L    | 4185415  | 4182425  | -      | 1       |
|          | CG17760 | CG17759 | 2R    | 9222236  | 9218438  | +      | 1       |
|          | CG4200  | CG12223 | X     | 15354878 | 15351613 | +      | 1       |
|          | CG33162 | CG5939  | 3L    | 8525442  | 8502118  | -      | 1       |
|          | CG5196  | CG34402 | 3R    | 12884563 | 12880752 | -      | 1       |
|          | CG33115 | CG8942  | 2L    | 13552279 | 13546280 | -      | 7       |
|          | CG14935 | CG14934 | 2L    | 11526363 | 11522417 | +      | 1       |
|          | CG14987 | CG1134  | 3L    | 3920390  | 3910549  | +      | 3       |
|          | CG32751 | CG32754 | X     | 5729860  | 5725985  | -      | 1       |
|          | CG33162 | CG5939  | 3L    | 8526534  | 8501627  | -      | 1       |
|          | CG32280 | CG11495 | 3L    | 3024302  | 3020851  | +      | 1       |
|          | CG4231  | CG12193 | 2L    | 1460323  | 1458239  | +      | 1       |
|          | CG6533  | CG6511  | 3L    | 8514355  | 8507883  | +      | 1       |
|          | CG4381  | CG4181  | 3R    | 12913682 | 12912587 | -      | 1       |

Table S25: Number of duplications and association with repetitive sequence by chromosome

| Species            | Chrom | Total | 100bp Repeat | 30bp Repeat | TE within 1kb | TE within 100bp |
|--------------------|-------|-------|--------------|-------------|---------------|-----------------|
| <i>D. yakuba</i>   | 2L    | 334   | 16           | 45          | 50            | 14              |
|                    | 2R    | 294   | 34           | 52          | 63            | 17              |
|                    | 3L    | 225   | 22           | 35          | 13            | 3               |
|                    | 3R    | 256   | 32           | 52          | 21            | 6               |
|                    | X     | 279   | 18           | 50          | 17            | 7               |
|                    | 4     | 27    | 3            | 3           | 15            | 4               |
|                    | Total | 1415  | 125          | 237         | 179           | 52              |
| <i>D. simulans</i> | 2L    | 154   | 9            | 23          | 18            | 8               |
|                    | 2R    | 200   | 8            | 23          | 41            | 17              |
|                    | 3L    | 198   | 5            | 19          | 31            | 16              |
|                    | 3R    | 178   | 8            | 18          | 3             | 1               |
|                    | X     | 231   | 26           | 67          | 25            | 9               |
|                    | 4     | 14    | 0            | 0           | 3             | 1               |
|                    | Total | 975   | 56           | 150         | 121           | 52              |

Table S26: Direct repeats 30bp or larger within 25kb span in reference

| Species            | Chrom | Number |
|--------------------|-------|--------|
| <i>D. yakuba</i>   | 2L    | 117    |
|                    | 2R    | 94     |
|                    | 3L    | 80     |
|                    | 3R    | 154    |
|                    | X     | 78     |
| <i>D. simulans</i> | 2L    | 62     |
|                    | 2R    | 48     |
|                    | 3L    | 25     |
|                    | 3R    | 46     |
|                    | X     | 24     |

Table S27: Tukey's HSD test for log normalized duplication size by chromosome

| Species            | Chromosome | vs. Chromosome | Difference | Lower  | Upper  | Adjusted <i>P</i> -value |
|--------------------|------------|----------------|------------|--------|--------|--------------------------|
| <i>D. yakuba</i>   | 2R         | 2L             | 0.399      | 0.092  | 0.706  | $2.95 \times 10^{-3**}$  |
|                    | 3L         | 2L             | -0.128     | -0.459 | 0.204  | 0.881                    |
|                    | 3L         | 2R             | -0.527     | -0.867 | -0.187 | $1.5 \times 10^{-4**}$   |
|                    | 3R         | 2R             | -0.444     | -0.772 | -0.115 | $1.67 \times 10^{-3**}$  |
|                    | 3R         | 2L             | -0.045     | -0.363 | 0.274  | 0.999                    |
|                    | 3R         | 3L             | 0.083      | -0.268 | 0.434  | 0.985                    |
|                    | X          | 2R             | -1.081     | -1.402 | -0.760 | $< 10^{-16**}$           |
|                    | X          | 2L             | -0.682     | -0.994 | -0.371 | $8.14 \times 10^{-9**}$  |
|                    | X          | 3L             | -0.554     | -0.898 | -0.210 | $6.80 \times 10^{-5**}$  |
|                    | X          | 3R             | -0.638     | -0.970 | -0.305 | $7.74 \times 10^{-7**}$  |
|                    | X          | 4              | -0.574     | -1.348 | 0.200  | 0.279                    |
|                    | 4          | 2L             | -0.108     | -0.876 | 0.660  | 0.999                    |
|                    | 4          | 2R             | -0.507     | -1.279 | 0.265  | 0.419                    |
|                    | 4          | 3R             | -0.063     | -0.840 | 0.714  | 1.000                    |
| 4                  | 3L         | 0.020          | -0.762     | 0.802  | 1.000  |                          |
| <i>D. simulans</i> | 2R         | 2L             | 0.064      | -0.353 | 0.480  | 0.998                    |
|                    | 3L         | 2L             | 0.444      | 0.027  | 0.862  | 0.029*                   |
|                    | 3L         | 2R             | 0.380      | -0.009 | 0.770  | 0.060                    |
|                    | 3R         | 2R             | -0.170     | -0.570 | 0.231  | 0.832                    |
|                    | 3R         | 2L             | -0.106     | -0.533 | 0.322  | 0.981                    |
|                    | X          | 2L             | -0.080     | -0.484 | 0.324  | 0.993                    |
|                    | X          | 2R             | -0.144     | -0.519 | 0.231  | 0.884                    |
|                    | X          | 3L             | -0.524     | -0.900 | -0.148 | $1.06 \times 10^{-3**}$  |
|                    | X          | 3R             | 0.026      | -0.362 | 0.413  | 1.000                    |
|                    | X          | 4              | 1.023      | -0.047 | 2.092  | 0.070                    |
|                    | 3R         | 3L             | -0.550     | -0.951 | -0.149 | $1.36 \times 10^{-3**}$  |
|                    | 4          | 2L             | -1.102     | -2.187 | -0.018 | 0.044*                   |
|                    | 4          | 2R             | -1.166     | -2.241 | -0.092 | 0.024*                   |
|                    | 4          | 3L             | -1.547     | -2.621 | -0.472 | $6.11 \times 10^{-4**}$  |
| 4                  | 3R         | -0.997         | -2.075     | 0.082  | 0.089  |                          |

\*  $P < 0.05$ , \*\*  $P < 0.01$

Table S28: Tukey's HSD test for number of duplications per mapped bp by chromosome

| Species            | Chromosome | vs. Chromosome | difference              | lower                   | upper                   | Adjusted <i>P</i> -value  |
|--------------------|------------|----------------|-------------------------|-------------------------|-------------------------|---------------------------|
| <i>D. yakuba</i>   | 2R         | 2L             | $2.955 \times 10^{-7}$  | $-2.506 \times 10^{-7}$ | $8.415 \times 10^{-7}$  | 0.620                     |
|                    | 3L         | 2L             | $-2.049 \times 10^{-7}$ | $-7.510 \times 10^{-7}$ | $3.411 \times 10^{-7}$  | 0.885                     |
|                    | 3R         | 2L             | $-1.104 \times 10^{-7}$ | $-6.565 \times 10^{-7}$ | $4.356 \times 10^{-7}$  | 0.992                     |
|                    | 3L         | 2R             | $-5.004 \times 10^{-7}$ | $-1.046 \times 10^{-6}$ | $4.566 \times 10^{-8}$  | 0.092                     |
|                    | 3R         | 2R             | $-4.059 \times 10^{-7}$ | $-9.519 \times 10^{-7}$ | $1.401 \times 10^{-7}$  | 0.267                     |
|                    | 3R         | 3L             | $9.449 \times 10^{-8}$  | $-4.516 \times 10^{-7}$ | $6.405 \times 10^{-7}$  | 0.996                     |
|                    | X          | 2L             | $3.587 \times 10^{-7}$  | $-1.873 \times 10^{-7}$ | $9.047 \times 10^{-7}$  | 0.404                     |
|                    | X          | 2R             | $6.323 \times 10^{-8}$  | $-4.828 \times 10^{-7}$ | $6.093 \times 10^{-7}$  | 0.999                     |
|                    | X          | 3L             | $5.636 \times 10^{-7}$  | $1.756 \times 10^{-8}$  | $1.110 \times 10^{-6}$  | 0.039*                    |
|                    | X          | 3R             | $4.691 \times 10^{-7}$  | $-7.692 \times 10^{-8}$ | $1.015 \times 10^{-6}$  | 0.135                     |
|                    | X          | 4              | $-6.273 \times 10^{-7}$ | $-1.217 \times 10^{-6}$ | $-3.750 \times 10^{-8}$ | 0.030*                    |
|                    | 4          | 2L             | $9.860 \times 10^{-7}$  | $3.962 \times 10^{-7}$  | $1.576 \times 10^{-6}$  | $4.969 \times 10^{-05**}$ |
|                    | 4          | 2R             | $6.905 \times 10^{-7}$  | $1.007 \times 10^{-7}$  | $1.280 \times 10^{-6}$  | 0.012*                    |
|                    | 4          | 3L             | $1.191 \times 10^{-6}$  | $6.011 \times 10^{-7}$  | $1.781 \times 10^{-6}$  | $1.766 \times 10^{-6**}$  |
|                    | 4          | 3R             | $1.096 \times 10^{-6}$  | $5.066 \times 10^{-7}$  | $1.686 \times 10^{-6}$  | $7.319 \times 10^{-6**}$  |
| <i>D. simulans</i> | 2R         | 2L             | $3.962 \times 10^{-7}$  | $-4.214 \times 10^{-8}$ | $8.344 \times 10^{-7}$  | 0.101                     |
|                    | 3L         | 2L             | $3.565 \times 10^{-7}$  | $-8.180 \times 10^{-8}$ | $7.948 \times 10^{-7}$  | 0.180                     |
|                    | 3R         | 2L             | $-6.753 \times 10^{-8}$ | $-5.058 \times 10^{-7}$ | $3.708 \times 10^{-7}$  | 0.998                     |
|                    | 3L         | 2R             | $-3.966 \times 10^{-8}$ | $-4.780 \times 10^{-7}$ | $3.986 \times 10^{-7}$  | 1.000                     |
|                    | 3R         | 2R             | $-4.637 \times 10^{-7}$ | $-9.020 \times 10^{-7}$ | $-2.538 \times 10^{-8}$ | 0.032*                    |
|                    | 3R         | 3L             | $-4.240 \times 10^{-7}$ | $-8.623 \times 10^{-7}$ | $1.428 \times 10^{-8}$  | 0.064                     |
|                    | X          | 2L             | $1.107 \times 10^{-6}$  | $6.687 \times 10^{-7}$  | $1.545 \times 10^{-6}$  | $5.742 \times 10^{-10**}$ |
|                    | X          | 2R             | $7.109 \times 10^{-7}$  | $2.726 \times 10^{-7}$  | $1.149 \times 10^{-6}$  | $1.0537 \times 10^{-4**}$ |
|                    | X          | 3L             | $7.505 \times 10^{-7}$  | $3.123 \times 10^{-7}$  | $1.189 \times 10^{-6}$  | $3.574 \times 10^{-5**}$  |
|                    | X          | 3R             | $1.175 \times 10^{-6}$  | $7.363 \times 10^{-7}$  | $1.613 \times 10^{-6}$  | $5.891 \times 10^{-11**}$ |
|                    | X          | 4              | $-4.977 \times 10^{-7}$ | $-9.417 \times 10^{-7}$ | $-5.369 \times 10^{-8}$ | 0.019*                    |
|                    | 4          | 2L             | $1.605 \times 10^{-6}$  | $1.161 \times 10^{-6}$  | $2.049 \times 10^{-6}$  | $3.675 \times 10^{-14**}$ |
|                    | 4          | 2R             | $1.209 \times 10^{-6}$  | $7.646 \times 10^{-7}$  | $1.653 \times 10^{-6}$  | $3.144 \times 10^{-11**}$ |
|                    | 4          | 3L             | $1.248 \times 10^{-6}$  | $8.042 \times 10^{-7}$  | $1.692 \times 10^{-6}$  | $8.245 \times 10^{-12**}$ |
|                    | 4          | 3R             | $1.672 \times 10^{-6}$  | $1.228 \times 10^{-6}$  | $2.116 \times 10^{-6}$  | $2.420 \times 10^{-14**}$ |

\*  $P < 0.05$ , \*\*  $P < 0.01$

Table S29: Duplications confirmed via split read mapping with Pindel

| Species            | Chromosome | Confirmed | Total | Percent Confirmed |
|--------------------|------------|-----------|-------|-------------------|
| <i>D. yakuba</i>   | 2L         | 42        | 334   | 12.5%             |
|                    | 2R         | 26        | 294   | 8.8%              |
|                    | 3L         | 31        | 225   | 13.7%             |
|                    | 3R         | 45        | 256   | 17.6%             |
|                    | X          | 32        | 279   | 11.5%             |
|                    | 4          | 3         | 27    | 11.1%             |
| <i>D. simulans</i> | 2L         | 30        | 154   | 19.5%             |
|                    | 2R         | 39        | 200   | 19.5%             |
|                    | 3L         | 29        | 198   | 14.6%             |
|                    | 3R         | 29        | 178   | 16.3%             |
|                    | X          | 31        | 231   | 13.4%             |
|                    | 4          | 4         | 14    | 28.6%             |

Table S30: Breakpoints Reconstructed

| Species            | Min Size (bp) | Chromosome | Reconstructed | Total | Percent Reconstructed |
|--------------------|---------------|------------|---------------|-------|-----------------------|
| <i>D. yakuba</i>   | 0             | 2L         | 145           | 338   | 42.9                  |
|                    |               | 2R         | 133           | 296   | 44.9                  |
|                    |               | 3L         | 78            | 237   | 32.9                  |
|                    |               | 3R         | 97            | 260   | 37.3                  |
|                    |               | X          | 81            | 284   | 28.5                  |
|                    |               | 4          | 8             | 27    | 29.6                  |
|                    | 325           | 2L         | 142           | 256   | 55.5                  |
|                    |               | 2R         | 133           | 253   | 52.6                  |
|                    |               | 3L         | 75            | 170   | 44.1                  |
|                    |               | 3R         | 95            | 195   | 48.7                  |
|                    |               | X          | 74            | 162   | 45.7                  |
|                    |               | 4          | 8             | 21    | 38.1                  |
|                    | 500           | 2L         | 138           | 229   | 60.3                  |
|                    |               | 2R         | 131           | 231   | 56.7                  |
|                    |               | 3L         | 72            | 150   | 48.0                  |
|                    |               | 3R         | 93            | 174   | 53.4                  |
|                    |               | X          | 66            | 130   | 50.8                  |
|                    |               | 4          | 8             | 20    | 40.0                  |
|                    | 1000          | 2L         | 127           | 194   | 65.5                  |
|                    |               | 2R         | 124           | 209   | 59.3                  |
|                    |               | 3L         | 62            | 111   | 55.9                  |
| 3R                 |               | 88         | 150           | 58.7  |                       |
| X                  |               | 58         | 95            | 61.1  |                       |
| 4                  |               | 7          | 14            | 50.0  |                       |
| <i>D. simulans</i> | 0             | 2L         | 87            | 157   | 55.4                  |
|                    |               | 2R         | 102           | 200   | 51.0                  |
|                    |               | 3L         | 85            | 198   | 42.9                  |
|                    |               | 3R         | 77            | 178   | 43.3                  |
|                    |               | 4          | 3             | 14    | 21.4                  |
|                    |               | X          | 106           | 231   | 45.9                  |
|                    | 325           | 2L         | 85            | 118   | 72.0                  |
|                    |               | 2R         | 100           | 171   | 58.5                  |
|                    |               | 3L         | 85            | 162   | 52.5                  |
|                    |               | 3R         | 76            | 140   | 54.3                  |
|                    |               | 4          | 3             | 8     | 37.5                  |
|                    |               | X          | 102           | 177   | 57.6                  |
|                    | 500           | 2L         | 84            | 109   | 77.1                  |
|                    |               | 2R         | 98            | 146   | 67.1                  |
|                    |               | 3L         | 82            | 147   | 55.8                  |
|                    |               | 3R         | 74            | 115   | 64.3                  |
|                    |               | 4          | 3             | 6     | 50.0                  |
|                    |               | X          | 98            | 154   | 63.6                  |
|                    | 1000          | 2L         | 71            | 87    | 81.6                  |
|                    |               | 2R         | 85            | 114   | 74.6                  |
|                    |               | 3L         | 76            | 128   | 59.4                  |
| 3R                 |               | 67         | 88            | 76.1  |                       |
| 4                  |               | 2          | 2             | 100.0 |                       |
| X                  |               | 77         | 110           | 70.0  |                       |



Table S31: Duplications with increased coverage compared to reference

| Species            | total | >25% | >50% | >75% |
|--------------------|-------|------|------|------|
| <i>D. yakuba</i>   | 1442  | 833  | 646  | 430  |
| <i>D. simulans</i> | 978   | 641  | 507  | 321  |

## Supplementary Figures

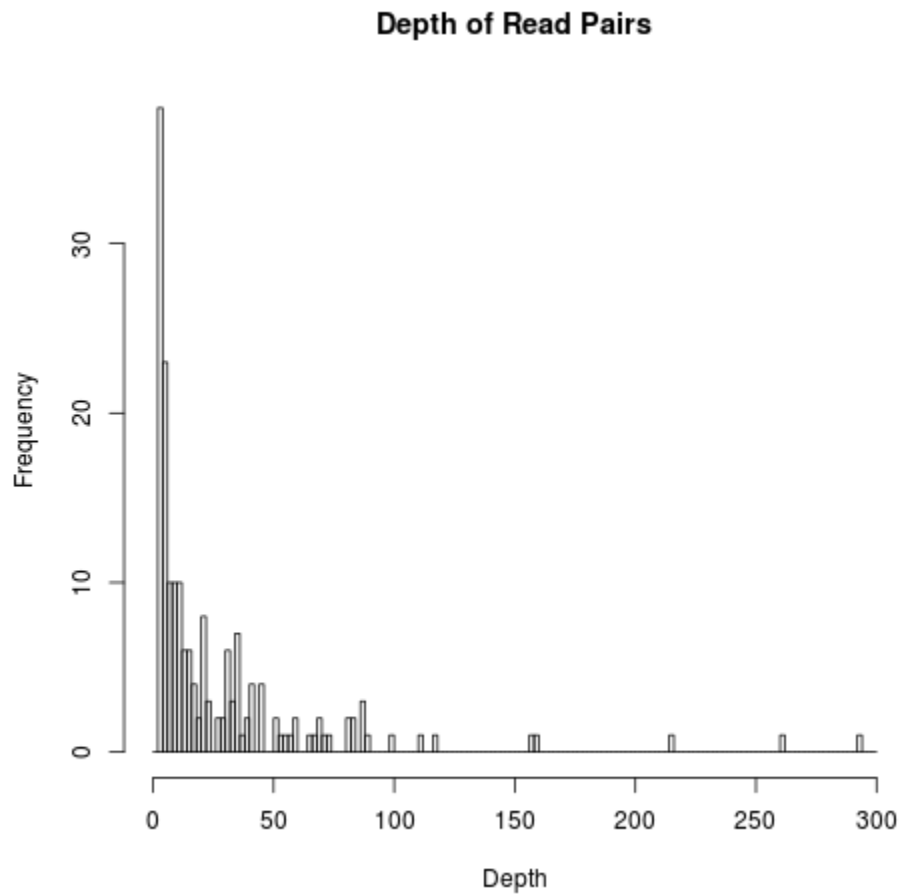

Figure S1: Histogram of read pair depth indicating a tandem duplication for sample strain CY20A. Number of read pairs is highly skewed and ranges from 3-300 read pairs supporting each event. Mean depth is 22.3, and median of 11 read pairs.

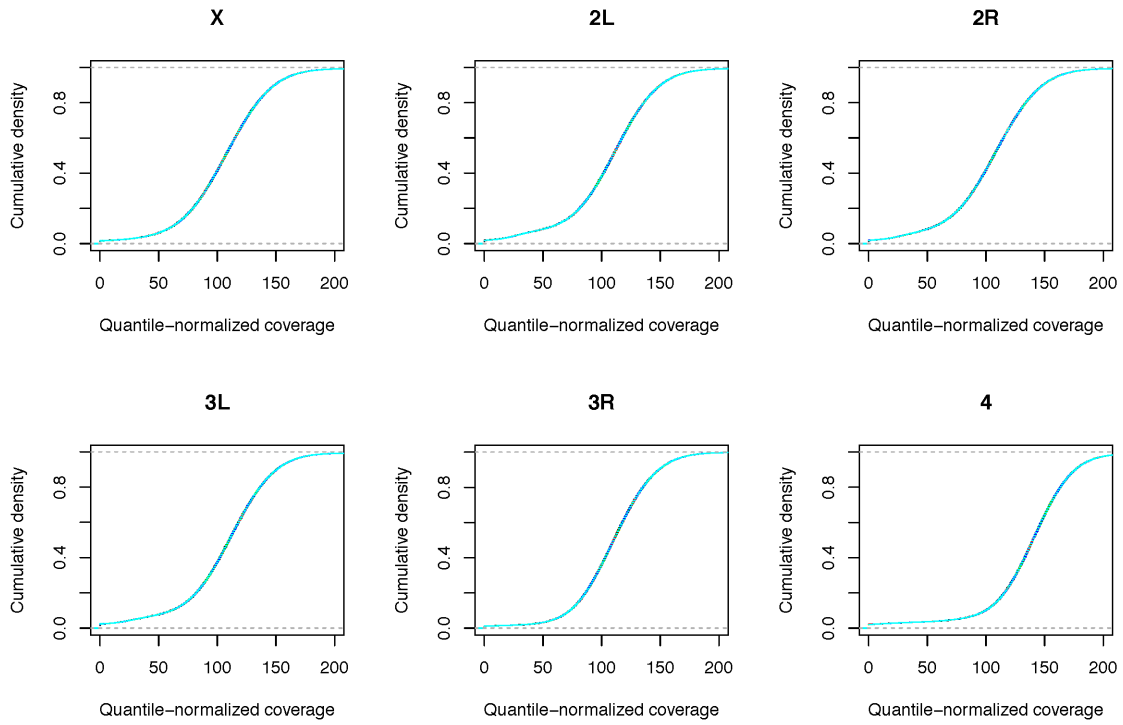

Figure S2: Cumulative distribution plots of the result of quantile-normalization of raw sequence coverage for the *D. simulans* samples. All 21 samples are plotted, each with an arbitrary color. Compared to the variable median raw coverage values shown in Table S4, the quantile normalization procedure results in the same distribution of coverage for all samples.

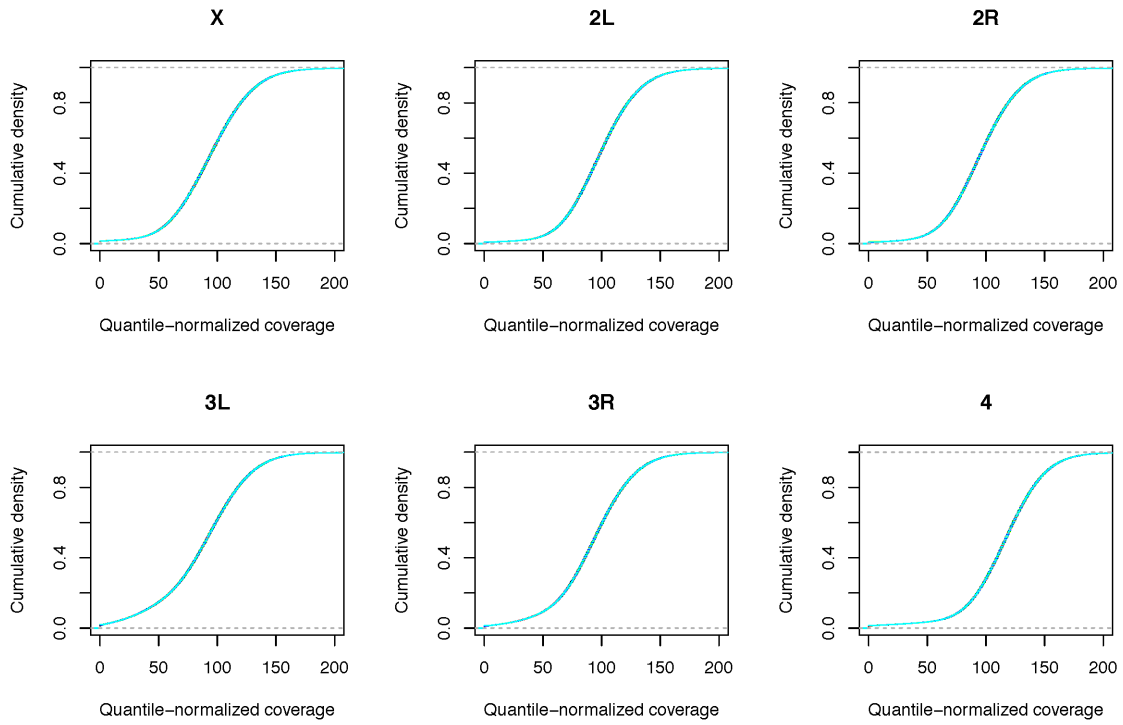

Figure S3: Cumulative distribution plots of the result of quantile-normalization of raw sequence coverage for the *D. yakuba* samples. All 21 samples are plotted, each with an arbitrary color. Compared to the variable median raw coverage values shown in Table S4, the quantile normalization procedure results in the same distribution of coverage for all samples.

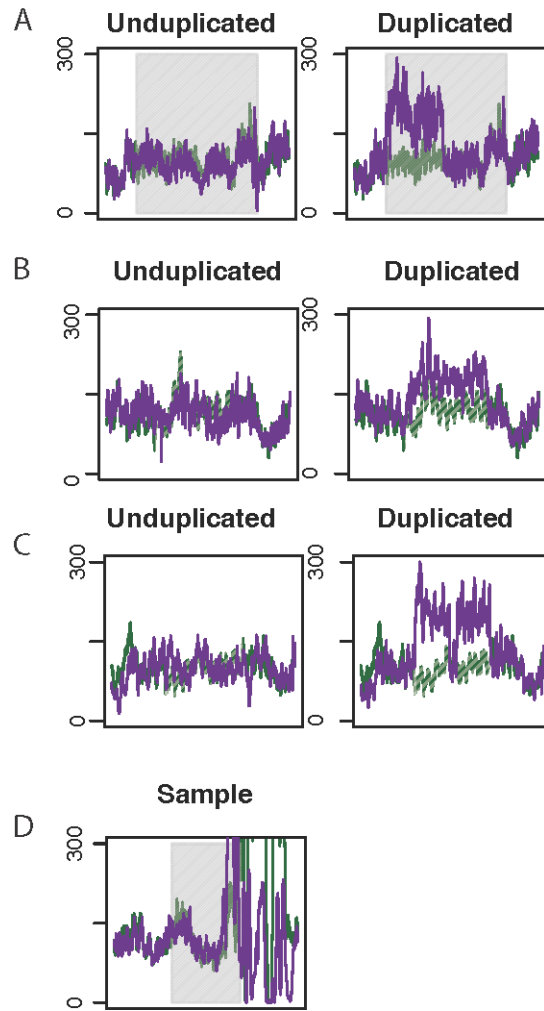

Figure S4: Cases where automated detection of duplicates using coverage becomes problematic. A. A duplication has occurred but coverage does not increase for the full variant length. Possible explanations include subsequent deletion, duplication combined with gene conversion in an adjacent region, or TE movement combined with duplication. B. Coverage increases, but there remains substantial overlap between sample and reference coverage. Modest coverage increases such as these could putatively be hemizygous duplicates, high variance in coverage, or other factors. C. A region is duplicated with subsequent deletion in the interior of one copy. D. Reference and sample variance are typical in one region but variance is magnified in an adjacent region. Automated detection for the typical region may be problematic due to an inability to properly estimate HMM parameters due to the abnormally high variance in the same window.

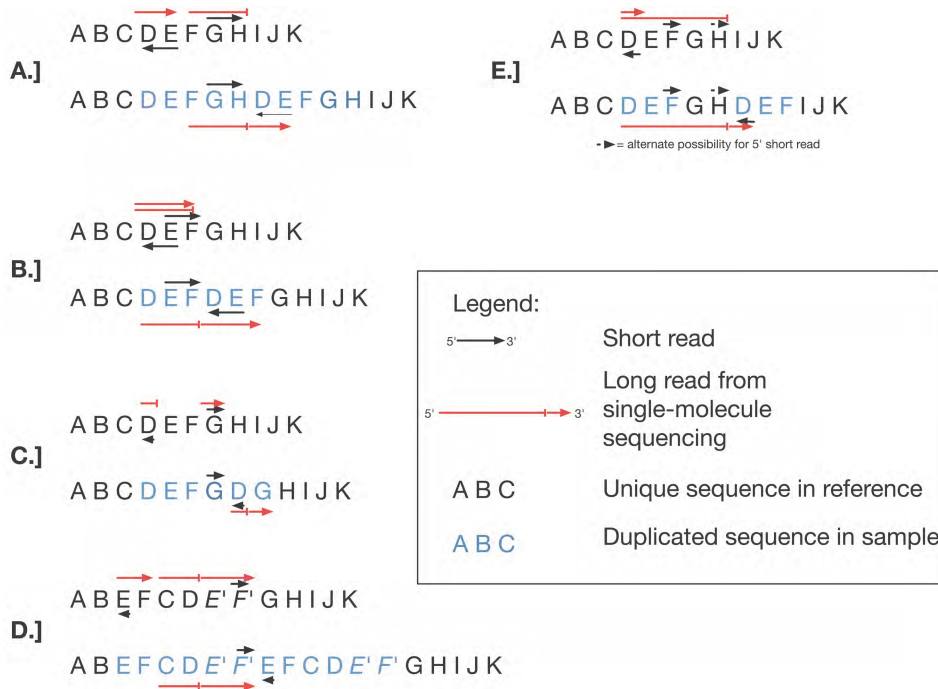

Figure S5: Confirmation of tandem duplications using single-molecule sequencing. We considered five simple breakpoint structures resulting from simple tandem duplication events. A.] A simple tandem duplication. Short reads (black arrows) from this type of breakpoint map in a divergent orientation, with reads aligning to different strand and pointing (5' to 3') away from each other (Cridland and Thornton 2010) when aligned to the reference. A long read (red arrow) spanning such a breakpoint will align discontinuously to the reference, with the fragment from the 3' section of the breakpoint aligning to the reference upstream of where the fragment from the 5' section of the breakpoint aligns. These fragments are expected to align to the loci where the divergently-oriented reads aligned. B.] When the long read is long relative to the length of the duplication, the entire duplication event may be captured in a single read. In this case, the long read will contain two alignments to the region flanked by divergently-oriented short reads. C.] The case of an incomplete duplication, where markers E and F are deleted from the tandem duplicate. In this case, 5' fragment of a long read will align to the 5' segment of the reference containing divergently-oriented short reads (*e.g.* short reads aligned to the minus strand), and the 3' fragment will align to the 3' cluster of divergently-oriented reads (which are aligned to the plus strand). The two fragments of the long read will align to the same strand in the same orientation. D.] The case of a tandem duplication involving semi-repetitive sequence. Here, the regions EF and E'F' in the reference are assumed to be similar, but not identical, in sequence, such that short reads may align uniquely to positions differentiating the two loci. A long read spanning the repetitive segment will result in a fragment aligning twice to the reference. This multiply-mapping segment will cover both regions containing divergently-oriented short reads. E.] The case of a tandem duplication separated by spacer sequence. For this case, there are two possible configurations for divergently-oriented short reads, and a long read spanning the novel breakpoint will contain two different regions mapping to the same part of the reference sequence.

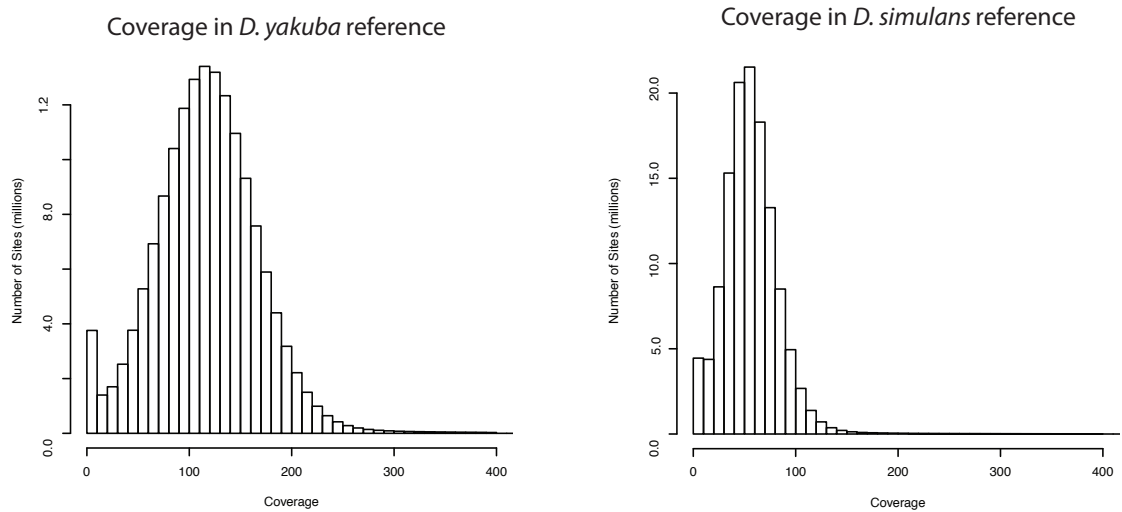

Figure S6: Histogram of raw coverage in the *D. yakuba* and *D. simulans* reference genomes. Sites with coverage higher than 400X not shown. Median coverage in the *D. yakuba* reference was 115X whereas the *D. simulans* reference was sequenced to 55X.

## Reference

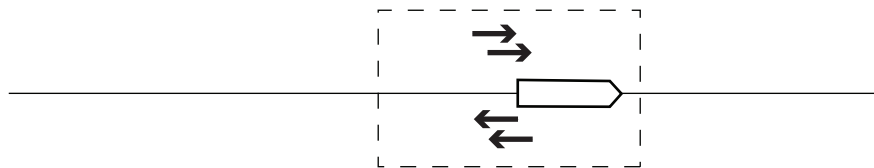

## Sample

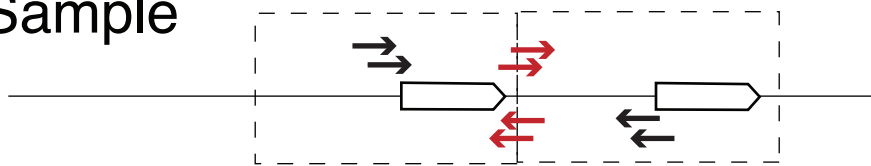

Figure S7: Unique Reads at duplication breakpoints. A duplication in the sample strain (below) is used to generate paired-end sequencing libraries. Read pairs interior to duplication boundaries map uniquely to the genome. However read pairs which overlap with duplication boundaries (red) contain unique sequence which is not present in the reference and remain unmapped. Breakpoint sequence can be assembled *de novo* from unmapped partners of mapped reads.



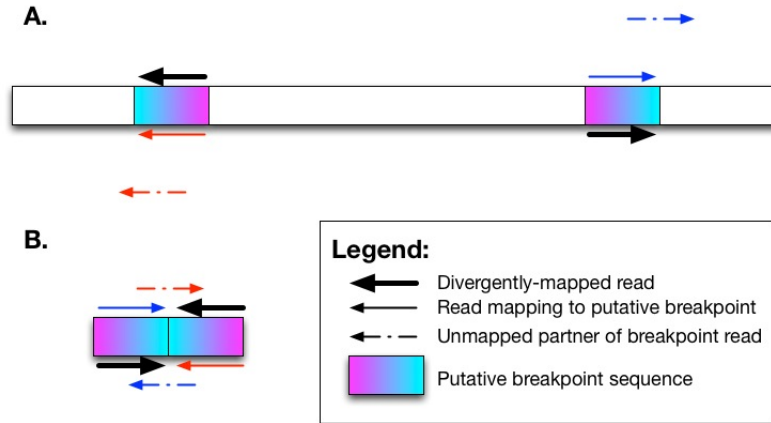

Figure S8: Cartoon of *de novo* assembly procedure. (a) We mined the alignment archives (bam files) for both the divergently-mapping reads (thick black arrows) and the mapped/unmapped pairs whose mapped reads align to the putative breakpoint regions. (b) Once assembled using *phrap*, a single contig with reads spanning the novel junction of the breakpoint confirms the detection of a tandem duplication with a simple breakpoint sequence.

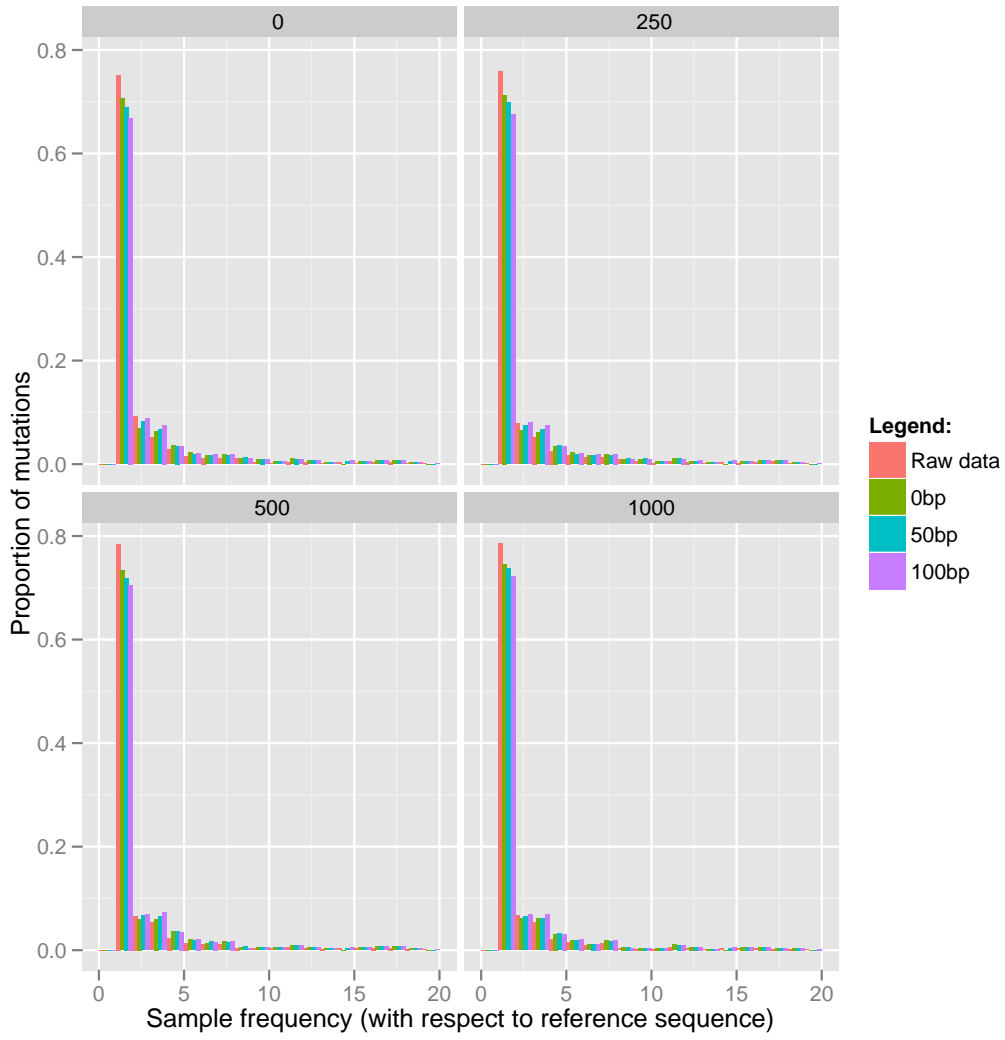

Figure S9: SFS for confirmed breakpoints in *D. yakuba*

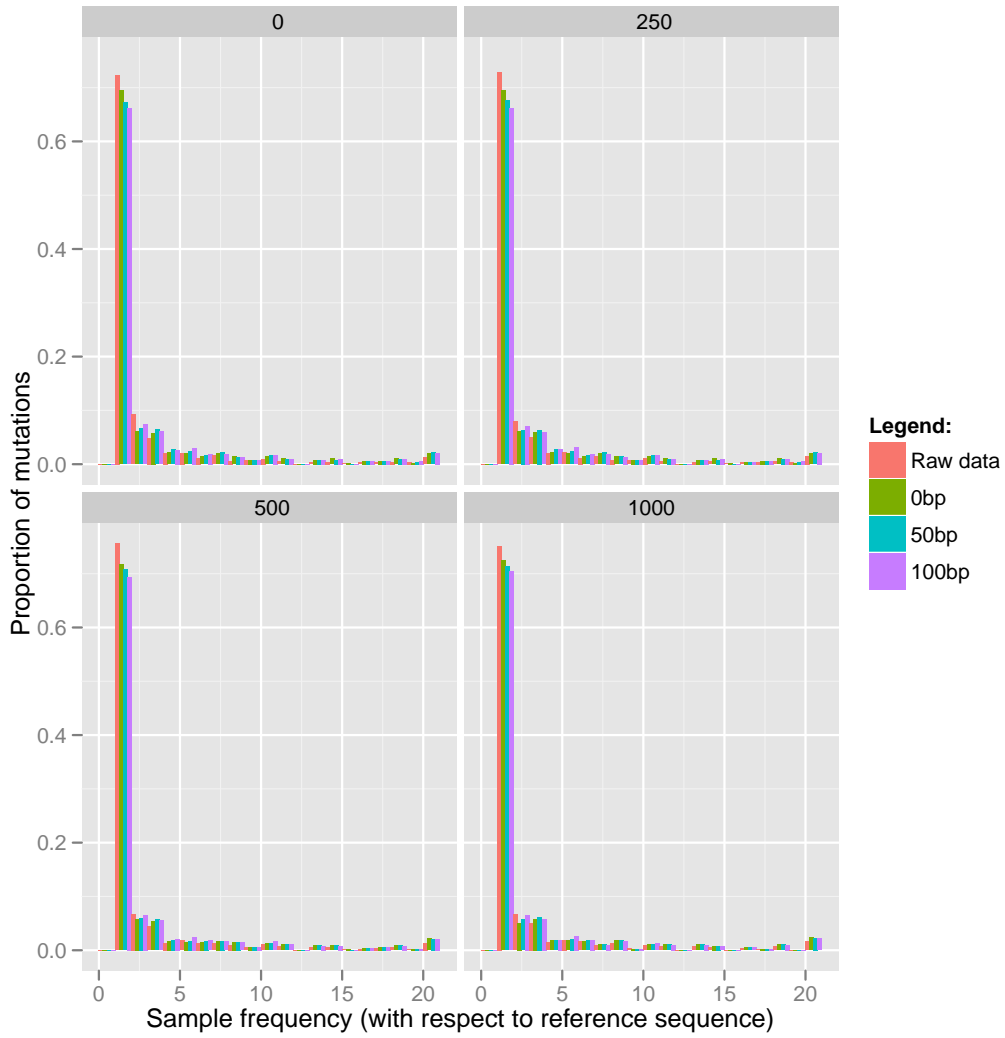

Figure S10: SFS for confirmed breakpoints in *D. simulans*
